# Supplementary material
Source: PubMed Central journal article supplement (PMC7832443)
Supplement: mmc1.pdf [file mmc1.pdf]

# THE LANCET

## Infectious Diseases

### Supplementary appendix 1

This translation in Chinese was submitted by the authors and we reproduce it as supplied. It has not been peer reviewed. *The Lancet's* editorial processes have only been applied to the original in English, which should serve as reference for this manuscript.

Supplement to: Zhang Y, Zeng G, Pan H, et al. Safety, tolerability, and immunogenicity of an inactivated SARS-CoV-2 vaccine in healthy adults aged 18–59 years: a randomised, double-blind, placebo-controlled, phase 1/2 clinical trial. *Lancet Infect Dis* 2020; published online Nov 17. [https://doi.org/10.1016/S1473-3099\(20\)30843-4](https://doi.org/10.1016/S1473-3099(20)30843-4).

此简体中文译文由作者提交，我方按照提供的版本刊登。此译文并未经过同行审阅。医学期刊《柳叶刀》的编辑流程仅适用于英文原稿，英文原稿应作为此手稿的参考。

**研究背景：**新型冠状病毒导致的高患病率和死亡率前所未有，目前，全世界范围内迫切需要能够有效预防 COVID-19 的疫苗。北京科兴中维生物技术有限公司生产的新型冠状病毒灭活疫苗（克尔来福）是候选疫苗之一，我们对其安全性、耐受性和免疫原性进行了研究。

**研究方法：**本研究是一项在 18~59 岁健康成人中开展的随机、双盲、安慰剂对照的 I/II 期临床试验，研究现场为中国江苏省睢宁县疾病预防控制中心。有 SARS-CoV-2 暴露史或感染史，或腋下体温超过 37.0°C，或对任何一种疫苗成分过敏的志愿者均不纳入本研究。I 期和 II 期临床试验的试验疫苗分别采用细胞工厂（品牌：康宁；型号：CellSTACK 10 层培养容器；产地：中国，吴江）和生物反应器（品牌：GE；型号：ReadyToProcess WAVE 25，产地：瑞典，于默奥）工艺进行生产。I 期临床试验采用剂量爬坡的方式开展。在筛选阶段将受试者以非随机的方式，按照 1:1 的比例分配至两个队列，分别按照 0/14 天免疫程序或 0/28 天免疫程序进行两剂次接种。以上每个队列中，前 36 名受试者组成低剂量（3 $\mu$ g/0.5ml/每剂）区组，后 36 名受试者组成高剂量（6 $\mu$ g/0.5ml/每剂）区组，每个区组中的受试者采用区组（长度为 6）随机的方法按照 2:1 的比例随机分配至两组，分别接种相应剂量的克尔来福或安慰剂。II 期临床试验中，在筛选阶段将受试者以非随机的方式，按照 1:1 的比例分配至 0/14 天免疫程序队列或 0/28 天免疫程序队列，以上每个队列中的受试者采用区组（长度为 5）随机的方法，按照 2:2:1 的比例随机分配至 3 组，分别接种两剂低剂量、高剂量克尔来福或安慰剂。受试者、研究者和实验室人员均不知晓受试者分组信息。本研究中，主要安全性终点为至少接种了 1 剂的受试者（安全性分析集）中，接种后 28 天的不良反应发生率；主要免疫原性终点为完成全程免疫的受试者（符合方案集）中，0/14 天免疫程序末次接种后 14 天抗 SARS-CoV-2 中和抗体的阳转率，以及 0/28 天免疫程序末次接种后 28 天抗 SARS-CoV-2 中和抗体的阳转率。本研究已在 ClinicalTrials.gov 进行了登记（NCT04352608）。

**研究结果：**2020 年 4 月 16 日至 4 月 25 日期间，I 期临床试验共入组 144 名受试者，2020 年 5 月 3 日至 5 月 5 日期间，II 期临床试验共入组 600 名受试者。其中，I/II 期临床试验中共 743 名受试者至少完成了 1 剂接种（I 期 143 名，II 期 600 名），构成安全性数据集。I 期临床试验 0/14 天免疫程序，3 $\mu$ g 组、6 $\mu$ g 组和安慰剂组不良反应发生率分别为 29% (7/24)、38% (9/24)、8% (2/24)；0/28 天免疫程序，以上各组不良反应的发生率依次为 13% (3/24)、17% (4/24)、13% (3/23)；0/14 天免疫程序 3 $\mu$ g 组、6 $\mu$ g 组和安慰剂组两剂接种后 14 天中和抗体阳转率分别为 46% (11/24)、50% (12/24)、0% (0/24)，0/28 天免疫程序，以上各组两剂接种后 28 天中和抗体阳转率分别为 83% (20/24)、79% (19/24)、4% (1/24)。II 期临床试验 0/14 天免疫程序，3 $\mu$ g 组、6 $\mu$ g 组和安慰剂组不良反应发生率分别为 33% (40/120)、35% (42/120)、22% (13/60)；0/28 天免疫程序，以上各组不良反应的发生率依次为 19% (23/120)、19% (23/120)、18% (11/60)；0/14 天免疫程序 3 $\mu$ g 组、6 $\mu$ g 组和安慰剂组两剂接种后 14 天中和抗体阳转率分别为 92% (109/118)、98% (117/119)、3% (2/60)；0/28 天免疫程序以上各组两剂接种后 28 天中和抗体阳转率分别为 97% (114/117)、100% (118/118)、0% (0/59)。

**研究结论：**综合考虑疫苗安全性、免疫原性和生产能力，选择 3 $\mu$ g 剂量的克尔来福进入 III 期临床试验，进行免疫效果评价。
