# Supplementary material
Source: PubMed Central journal article supplement (PMC7832443)
Supplement: mmc2.pdf [file mmc2.pdf]

# THE LANCET

## Infectious Diseases

### Supplementary appendix 2

This appendix formed part of the original submission and has been peer reviewed. We post it as supplied by the authors.

Supplement to: Zhang Y, Zeng G, Pan H, et al. Safety, tolerability, and immunogenicity of an inactivated SARS-CoV-2 vaccine in healthy adults aged 18–59 years: a randomised, double-blind, placebo-controlled, phase 1/2 clinical trial. *Lancet Infect Dis* 2020; published online Nov 17. [https://doi.org/10.1016/S1473-3099\(20\)30843-4](https://doi.org/10.1016/S1473-3099(20)30843-4).

---

## Appendix 1 Immunogenic Detection Method

### Detection Method of Neutralization Potency against Pseudovirus

The serum to be tested was inactivated at 56°C for 30 minutes, a 3-fold serial dilution starting from 20-fold was carried out in a 96-well cell culture plate, and the volume of each was 100µl. Then 0.5µl pseudovirus with a concentration of  $1.3 \times 10^4$  TCID<sub>50</sub>/ml after the dilution by DMEM complete medium was added to each of the well, and placed in a carbon dioxide incubator at 36.5°C±1°C for one hour. After the neutralization, 100µl cell suspension with a concentration of  $2.0 \times 10^5$  cells/ml was added to the 96-well plate, and placed in a carbon dioxide incubator at 36.5°C±1°C for 20~28 hour. The 96-cell plate was taken out from the carbon dioxide incubator after the cultivation. A multichannel pipette was used to aspirate 150µl of supernatant from each well, 100µl luciferase detection reagent was added to the well. Subsequently, the 96-well plate was placed from light at room temperature for two minutes. After that, the liquid in the reaction well was pipette repeatedly for 6~8 times with a multichannel pipette to make the cells fully lysed. 150µl of liquid was taken from each well, and then was added to the corresponding 96-well chemiluminescence detection plate, which was placed in a chemiluminescence detector to read the luminescence value. Neutralization inhibition rate = [1-(average luminous intensity of the test product group-that of the blank control) / (average luminous intensity of negative group-that of blank control)] × 100%. ID<sub>50</sub> was calculated by the Reed-Muench method by the neutralization inhibition rate.

### Detection Method of Neutralization Potency against Live SARS-CoV-2

Micro cytopathic effect assay was adopted.

**Serum treatment:** all serum samples were inactivated at 56°C in a water bath for 30 minutes.

**Medium addition:** the cell maintenance medium was added to the cell control group at 100µL/well, and 50 µL/well of maintenance medium was supplemented to the to-be-tested serum group, virus back titration group and positive control group from the second dilution.

**Dilution of the serum sample:** The serum was diluted four-fold (60 µL sample + 180 µL maintenance medium) with cell maintenance medium (2% newborn calf serum-199 (2% sodium hydrogen carbonate) cell maintenance medium). The diluted serum was added to the cell plate at 100 µL/well, and each sample was diluted to 2 wells in parallel. 50 µL of the mixture in the first dilution was pipetted into the next dilution, and the mixture was pipetted up and down for 8-10 times. The mixture was diluted to the appropriate dilution range by this method, and 50 µL of the last dilution was discarded, and 50 µL of the diluted sample was retained in each well.

**Dilution of the virus for neutralization:** the SAR-CoV-2 used for neutralization was diluted to 100CCID<sub>50</sub>/0.05ml by titer.

**Neutralization:** Serum of different dilutions was mixed with 100CCID<sub>50</sub>/0.05ml virus liquid in equal volume (50µL+50µL), respectively, and then incubated in an incubator at 36.5°C, 5%CO<sub>2</sub> for 2h.

**Experimental control:** Negative serum control, positive serum control, serum sample and cell control were set simultaneously.

**Virus Back Titration:** The virus suspension diluted to 100 CCID<sub>50</sub>/0.05 mL was diluted via ten-fold serial dilution, i.e. diluted to 10 CCID<sub>50</sub>/0.05 mL, 1 CCID<sub>50</sub>/0.05 mL and 0.1 CCID<sub>50</sub>/0.05 mL, and added to the 96-well cell plate respectively, 12 well per dilution and 50 µL per well, then 50 µL of cell maintenance medium was added to each well, and the plate was incubated in an incubator at 36.5°C, 5% CO<sub>2</sub> for 5 days.

**Cell Inoculation and Culture:** After incubation, 100µL of Vero cell suspension (cell concentration: 1.0-2.0×10<sup>5</sup> cell/mL) was added to each well, and then incubated in an incubator at 36.5°C, 5% CO<sub>2</sub> for 5 days.

**Interpretation of the Results:** It was observed for the cytopathic effect after cultured for 3-5 days, and the neutralizing antibody titer of the to-be-tested serum sample was determined according to the observation results of

---

the cytopathic effect (CPE). The reciprocal of the highest serum dilution without cytopathic effects the end titer. When 1 of the 2 wells of the highest dilution serum shows CPE, while the other does not, the reciprocal of the dilution should be the neutralizing antibody titre of the serum specimen; the reciprocal of the mean dilution of the two wells should be the neutralizing antibody titre of the serum specimen when the 2 wells with the highest dilution are completely pathological while the adjacent 2 wells with low dilution are not pathological completely; when 1 of two adjacent wells is pathological while the other not, the reciprocal of the average dilutions of 2 wells should be the neutralizing antibody titer of the serum specimen. For example, 2 wells with high dilution of 1:8 have a complete CPE, while the adjacent 2 wells with low dilution of 1:16 have no CPE; or in 2 adjacent wells with dilutions of 1:8 and 1:16, one has a CPE, while the other does not. In this case, the reciprocal 12 of the average dilutions of 2 wells is the neutralizing antibody titer of the serum.

### **Detection Method of specific RBD IgG**

**Coating:** Dilute the recombinant RBD antigen with 0.01M PBS to a final concentration of 1µg/ml. Mix well and add to plate, 100µL per well. Incubate overnight (16-20 hours) at 2-8°C. Wash the plate for 3 times and dry the plate. **Blocking:** Prepare 0.01M blocking solution with 10% BSA, 200µL per well. Incubate for 60-120 minutes at 37°C. Store at 4°C and use within 7 days.

**Sample loading:** Perform dilution on serum samples with 0.01M PBS. Add one concentration (100µL) per well. Add same species negative blood to 8 wells as negative control. Take sample diluent as blank, add to 8 wells. Incubate at 37°C for 60 to 70 minutes. Wash with washing solution 3 times and dry the plate.

**Add HRP conjugated antibody:** Add 100µL HRP conjugated antibody (goat anti-human) per well, and incubate for 45-60 minutes at 37°C. Wash the plate for 5 times and dry the plate.

**Color developing:** Add 50µL color developing solution A and solution B onto the plate respectively, incubate for 15 minutes at room temperature.

**Termination of reaction:** Add 50µL stop solution to each well, read absorbance at 450nm (630nm as reference).

**Result determination:** Take 2.1 times of the absorbance of negative serum as the cut-off value, the antibody titer is determined as the highest dilution fold satisfy with OD>cut-off value. When OD is less than 0.05, take 0.05.

**Evaluation:** Take the maximum dilution ratio as the serum sample titer when the OD value is 2.1 times of the absorbance of negative serum at the same dilution ratio.

### **Detection Method of T Cell Immune Response**

ELISpot Method was adopted to detect the protein-specific T cell response.

The peripheral blood mononuclear cells (PBMCs) of the vaccine recipients can produce the cytokines after in vitro cytotoxic T lymphocyte (CTL) epitope stimulation. Such cytokines can be captured by the specific monoclonal antibody coated on the ELISPOT plate. After cell decomposition, the captured cytokine will bind with the biotin-labelled secondary antibody, and then bind with the horseradish peroxidase-labelled avidin. After substrate incubation, clear and distinguishable spots will appear at the positions of the cells which secrete the cytokine. Count the spot using the ELISpot analysis system. One spot indicates 1 viable cell. Calculate the frequency of the cells which secrete the cytokine. The procedure is as follows:

#### **Prepare ELISpot plate (aseptic conditions)**

- Insert the plate strip into the plate frame, and wash 4 times with sterile PBS (200 µL/well).
- Add 200 µL of RPMI1640+1% double antibody +10% FBS medium, and allow to stand at room temperature for more than 30 minutes.

#### **Culture of PBMCs in the ELISpot Plate (Aseptic Conditions)**

---

Prepare the 2× peptide stimulation mixture, stimulation-free control and positive stimulant with RPMI1640+1% double antibody +10% FBS medium according to the test requirements,

According to the layout of the plate, add 50 μL of each of the peptide stimulation mixture, stimulation-free control or positive stimulants to each well. Then add 50 μL of PBMCs of the corresponding density so that each well of the peptide stimulation well and stimulation-free well will contain  $1 \times 10^5$  cells, and each positive stimulation well will contain  $1 \times 10^4$  cells.

Establish 3 peptide stimulation wells, 3 stimulation-free wells and 2 positive stimulation wells for each portion of sample. Each well of the peptide stimulation well contains 1 μg/mL of each S protein overlapping peptide. Other conditions except free of overlapping peptide library of the stimulation-free wells are all same as those of the peptide stimulation wells. The stimulants used for the positive stimulation wells are PMA and Ionomycin. The concentrations of the stimulants are PMA 50 ng/mL and Ionomycin 500 ng/mL.

Incubate cells in the 37°C, 5% CO<sub>2</sub> cell incubator for 12 h to 24 h, and do not move ELISpot plate during the period.

#### **Spot Detection**

- Discard the cells in the plate, and wash the plate with PBS 5 times and 200 μL for each well.
- Dilute 7-B6-ALP with PBS+0.5 % FB according to 1:200, add 100 μL to each well on the ELISpot plate, and place at room temperature for 2 hours.
- Discard the liquid in the plate, and wash the plate with PBS 5 times and 200 μL for each well.
- Filter the substrate (BCIP/NBT-plus) through a 0.45 μm filter membrane, add 100 μL to each well, and react until obvious spot appears. Rinse with plenty of water to stop the reaction. Remove the plate frame from the plastic tray, and rinse the bottom surface of the membrane.
- After ELISpot plate is dry, use ELISA spot image analysis system to count and analyze the spots.

---

## **Appendix 2 List Study Endpoints**

### **➤ Study Endpoints of Phase 1**

#### **Primary Endpoint**

- Incidence of adverse reactions occur from the beginning of the vaccination to 28 days after the whole schedule vaccination.

#### **Secondary Endpoints**

- Incidence of adverse reactions within 7 days after each dose of vaccination;
- Incidence of abnormal laboratory index (blood routine test, blood chemistry test, and urine routine test) on the 3rd day after each dose of vaccination;
- Incidence of SAEs from the beginning of the vaccination to 6 months after the whole schedule vaccination;
- Seroconversion rate, seropositive rate, GMT and GMI of neutralizing antibody on the 7,14,21,28, and 42th day after the first dose vaccination (for the days 0 and 14 schedule);
- Seropositive rate of IgG and IgM antibody on the 7,14,21,28, and 42th day after the first dose vaccination (for the days 0 and 14 schedule);
- Seroconversion rate, seropositive rate, GMT and GMI of neutralizing antibody on the 28,35,42, and 56 th day after the first dose vaccination (for the days 0 and 28 schedule);
- Seropositive rate of IgG and IgM antibody on the 28, 35, 42, and 56th day after the first dose vaccination (for the days 0 and 28 schedule).

#### **Exploratory Endpoints**

- Positive rate of specific T cell response 14 days after the whole schedule vaccination (IFN- $\gamma$  detection using Elispot);
- Seropositive rate and GMT 6 months after the whole schedule vaccination;
- Change of IL-6, IL-2 and TNF- $\alpha$  in serum on the 7th day after each dose vaccination.

### **➤ Study Endpoints of Phase 2**

#### **Primary Endpoints**

- Seroconversion rate of neutralizing antibody on the 14th (for the days 0 and 14 schedule) or 28th (for the days 0 and 28 schedule) day after the whole schedule vaccination;
- Incidence of adverse reactions occur from the beginning of the vaccination to 28 days after the whole schedule vaccination.

#### **Secondary Endpoints**

- Seropositive rate, GMT, and GMI of the neutralizing antibody on the 14th (for the days 0 and 14 schedule) or 28th (for the days 0 and 28 schedule) day after the whole schedule vaccination;
- Seroconversion rate, seropositive rate, GMT, and GMI of the neutralizing antibody on the 28th day after the whole course vaccination for the days 0 and 14 schedule;
- Incidence of adverse reactions within 7 days after each dose vaccination;
- Incidence of SAEs from the beginning of the vaccination to 6 months after the whole schedule vaccination.

#### **Exploratory Endpoints**

- Seropositive rate and GMT of neutralizing antibody 6 months after the whole schedule vaccination.

### Appendix 3 Adverse events

**Table 3-1 Adverse Reactions Post Two Doses of 0/14 Schedule in the Phase 1 Clinical Trial.**

| Adverse reactions               | 3 µg group<br>(N=24) | 6 µg group<br>(N=24) | Placebo group<br>(N=24) | Total<br>(N=72) | P value† |
|---------------------------------|----------------------|----------------------|-------------------------|-----------------|----------|
| Total                           | 7(29.2)              | 9(37.5)              | 2(8.3)                  | 8(25.0)         | 0.0507   |
| Grade 1                         | 7(29.2)              | 9(37.5)              | 2(8.3)                  | 18(25.0)        | 0.0507   |
| <b>Solicited</b>                | 6(25.0)              | 9(37.5)              | 2(8.3)                  | 17(23.6)        | 0.0695   |
| <b>Unsolicited</b>              | 1(4.2)               | 2(8.3)               | 0(0.0)                  | 3(4.2)          | 0.7682   |
| <b>Systemic reactions</b>       | 3(12.5)              | 4(16.7)              | 1(4.2)                  | 8(11.1)         | 0.5137   |
| Fatigue                         | 2(8.3)               | 3(12.5)              | 1(4.2)                  | 6(8.3)          | 0.8654   |
| Hypersensitivity                | 0(0.0)               | 1(4.2)               | 0(0.0)                  | 1(1.4)          | 1.0000   |
| Diarrhea                        | 0(0.0)               | 1(4.2)               | 0(0.0)                  | 1(1.4)          | 1.0000   |
| Fever                           | 0(0.0)               | 1(4.2)               | 0(0.0)                  | 1(1.4)          | 1.0000   |
| Abdominal pain                  | 0(0.0)               | 1(4.2)               | 0(0.0)                  | 1(1.4)          | 1.0000   |
| Lower abdominal pain            | 1(4.2)               | 0(0.0)               | 0(0.0)                  | 1(1.4)          | 1.0000   |
| <b>Injection-site reactions</b> | 4(16.7)              | 5(20.8)              | 1(4.2)                  | 10(13.9)        | 0.3164   |
| Pain                            | 4(16.7)              | 5(20.8)              | 1(4.2)                  | 10(13.9)        | 0.3164   |
| Discolouration                  | 0(0.0)               | 1(4.2)               | 0(0.0)                  | 1(1.4)          | 1.0000   |

Note: data in the table were reported within 28 days post any of the two doses.

†P value of the comparison of incidence rate among three groups.

**Table 3-2 Adverse Reactions Post Dose 1 or Dose 2 of 0/14 Schedule in the Phase 1 Clinical Trial.**

| Adverse reactions               | Dose 1*              |                      |                         |                 |          | Dose 2¶              |                      |                         |                 |          |
|---------------------------------|----------------------|----------------------|-------------------------|-----------------|----------|----------------------|----------------------|-------------------------|-----------------|----------|
|                                 | 3 µg group<br>(N=24) | 6 µg group<br>(N=24) | Placebo group<br>(N=24) | Total<br>(N=72) | P value† | 3 µg group<br>(N=24) | 6 µg group<br>(N=24) | Placebo group<br>(N=24) | Total<br>(N=72) | P value† |
| Total                           | 7(29.2)              | 6(25.0)              | 2(8.3)                  | 15(20.8)        | 0.1845   | 1(4.2)               | 5(20.8)              | 1(4.2)                  | 7(9.7)          | 0.1991   |
| Grade 1                         | 7(29.2)              | 6(25.0)              | 2(8.3)                  | 15(20.8)        | 0.1845   | 1(4.2)               | 5(20.8)              | 1(4.2)                  | 7(9.7)          | 0.1991   |
| <b>Solicited</b>                | 6(25.0)              | 6(25.0)              | 2(8.3)                  | 14(19.4)        | 0.2728   | 1(4.2)               | 5(20.8)              | 1(4.2)                  | 7(9.7)          | 0.1991   |
| <b>Unsolicited</b>              | 1(4.2)               | 2(8.3)               | 0(0.0)                  | 3(4.2)          | 0.7682   | -                    | -                    | -                       | -               | -        |
| <b>Systemic reactions</b>       | 2(8.3)               | 2(8.3)               | 1(4.2)                  | 5(6.9)          | 1.0000   | 0(0.0)               | 2(8.3)               | 1(4.2)                  | 3(4.2)          | 0.7682   |
| Fatigue                         | 2(8.3)               | 1(4.2)               | 1(4.2)                  | 4(5.6)          | 1.0000   | 0(0.0)               | 2(8.3)               | 1(4.2)                  | 3(4.2)          | 0.7682   |
| Hypersensitivity                | 0(0.0)               | 1(4.2)               | 0(0.0)                  | 1(1.4)          | 1.0000   | -                    | -                    | -                       | -               | -        |
| Diarrhea                        | 0(0.0)               | 1(4.2)               | 0(0.0)                  | 1(1.4)          | 1.0000   | -                    | -                    | -                       | -               | -        |
| Fever                           | 0(0.0)               | 1(4.2)               | 0(0.0)                  | 1(1.4)          | 1.0000   | -                    | -                    | -                       | -               | -        |
| Abdominal pain                  | 0(0.0)               | 1(4.2)               | 0(0.0)                  | 1(1.4)          | 1.0000   | -                    | -                    | -                       | -               | -        |
| Lower abdominal pain            | 1(4.2)               | 0(0.0)               | 0(0.0)                  | 1(1.4)          | 1.0000   | -                    | -                    | -                       | -               | -        |
| <b>Injection-site reactions</b> | 4(16.7)              | 4(16.7)              | 1(4.2)                  | 9(12.5)         | 0.3700   | 1(4.2)               | 3(12.5)              | 0(0.0)                  | 4(5.6)          | 0.3143   |
| Pain                            | 4(16.7)              | 4(16.7)              | 1(4.2)                  | 9(12.5)         | 0.3700   | 1(4.2)               | 3(12.5)              | 0(0.0)                  | 4(5.6)          | 0.3143   |
| Discolouration                  | 0(0.0)               | 1(4.2)               | 0(0.0)                  | 1(1.4)          | 1.0000   | -                    | -                    | -                       | -               | -        |

Note: \*Reported within 14 days post dose 1. ¶Reported within 28 days post dose 2. †P value of the comparison of incidence rate among three groups.

**Table 3-3 Adverse Reactions Post Two Doses of 0/28 Schedule in the Phase 1 Clinical Trial.**

| Adverse reactions               | Dose 1*              |                      | Dose 2 <sup>¶</sup>     |                 | P value <sup>†</sup> |
|---------------------------------|----------------------|----------------------|-------------------------|-----------------|----------------------|
|                                 | 3 µg group<br>(N=24) | 6 µg group<br>(N=24) | Placebo group<br>(N=23) | Total<br>(N=71) |                      |
| <b>Total</b>                    | 3(12.5)              | 4(16.7)              | 3(13.0)                 | 10(14.1)        | 1.0000               |
| Grade 1                         | 3(12.5)              | 4(16.7)              | 3(13.0)                 | 10(14.1)        | 1.0000               |
| <b>Solicited</b>                | 3(12.5)              | 4(16.7)              | 3(13.0)                 | 10(14.1)        | 1.0000               |
| <b>Unsolicited</b>              | 0(0.0)               | 0(0.0)               | 1(4.4)                  | 1(1.4)          | 0.3239               |
| <b>Systemic reactions</b>       | 2(8.3)               | 2(8.3)               | 1(4.4)                  | 3(4.2)          | 0.5364               |
| Fever                           | 0(0.0)               | 1(4.2)               | 1(4.4)                  | 2(2.8)          | 0.7682               |
| Fatigue                         | 0(0.0)               | 1(4.2)               | 0(0.0)                  | 1(1.4)          | 1.0000               |
| Diarrhea                        | 1(4.2)               | 0(0.0)               | 0(0.0)                  | 1(1.4)          | 1.0000               |
| Cough                           | 2(8.3)               | 0(0.0)               | 0(0.0)                  | 2(2.8)          | 0.3239               |
| <b>Injection-site reactions</b> | 3(12.5)              | 3(12.5)              | 3(13.0)                 | 9(12.7)         | 1.0000               |
| Pain                            | 3(12.5)              | 3(12.5)              | 3(13.0)                 | 9(12.7)         | 1.0000               |
| Discolouration                  | 0(0.0)               | 0(0.0)               | 1(4.4)                  | 1(1.4)          | 1.0000               |

Note: data in the table were reported within 28 days post any of the two doses.

<sup>†</sup>P value of the comparison of incidence rate among three groups.

**Table 3-4 Adverse Reactions Post Dose 1 and Dose 2 of 0/28 Schedule in the Phase 1 Clinical Trial.**

| Adverse reactions               | Dose 1*              |                      |                         |                 |                      | Dose 2 <sup>¶</sup>  |                      |                         |                 |                      |
|---------------------------------|----------------------|----------------------|-------------------------|-----------------|----------------------|----------------------|----------------------|-------------------------|-----------------|----------------------|
|                                 | 3 µg group<br>(N=24) | 6 µg group<br>(N=24) | Placebo group<br>(N=23) | Total<br>(N=71) | P value <sup>†</sup> | 3 µg group<br>(N=24) | 6 µg group<br>(N=24) | Placebo group<br>(N=23) | Total<br>(N=71) | P value <sup>†</sup> |
| <b>Total</b>                    | 3(12.5)              | 3(12.5)              | 2(8.7)                  | 8(11.3)         | 1.0000               | 2(8.3)               | 1(4.2)               | 1(4.4)                  | 4(5.6)          | 1.0000               |
| Grade 1                         | 3(12.5)              | 3(12.5)              | 2(8.7)                  | 8(11.3)         | 1.0000               | 2(8.3)               | 1(4.2)               | 1(4.4)                  | 4(5.6)          | 1.0000               |
| <b>Solicited</b>                | 3(12.5)              | 3(12.5)              | 2(8.7)                  | 8(11.3)         | 1.0000               | 2(8.3)               | 1(4.2)               | 1(4.4)                  | 4(5.6)          | 1.0000               |
| <b>Unsolicited</b>              | 0(0.0)               | 0(0.0)               | 1(4.4)                  | 1(1.4)          | 0.3239               | -                    | -                    | -                       | -               | -                    |
| <b>Systemic reactions</b>       | 1(4.2)               | 1(4.2)               | 1(4.4)                  | 3(4.2)          | 1.0000               | 1(4.2)               | 1(4.2)               | 0(0.0)                  | 2(2.8)          | 1.0000               |
| Fever                           | 0(0.0)               | 1(4.2)               | 1(4.4)                  | 2(2.8)          | 0.7682               | -                    | -                    | -                       | -               | -                    |
| Fatigue                         | -                    | -                    | -                       | -               | -                    | 0(0.0)               | 1(4.2)               | 0(0.0)                  | 1(1.4)          | 1.0000               |
| Diarrhea                        | 1(4.2)               | 0(0.0)               | 0(0.0)                  | 1(1.4)          | 1.0000               | -                    | -                    | -                       | -               | -                    |
| Cough                           | 1(4.2)               | 0(0.0)               | 0(0.0)                  | 1(1.4)          | 1.0000               | 1(4.2)               | 0(0.0)               | 0(0.0)                  | 1(1.4)          | 1.0000               |
| <b>Injection-site reactions</b> | 3(12.5)              | 3(12.5)              | 2(8.7)                  | 8(11.3)         | 1.0000               | 1(4.2)               | 0(0.0)               | 1(4.4)                  | 2(2.8)          | 0.7682               |
| Pain                            | 3(12.5)              | 3(12.5)              | 2(8.7)                  | 8(11.3)         | 1.0000               | 1(4.2)               | 0(0.0)               | 1(4.4)                  | 2(2.8)          | 0.7682               |
| Discolouration                  | 0(0.0)               | 0(0.0)               | 1(4.4)                  | 1(1.4)          | 0.3239               | -                    | -                    | -                       | -               | -                    |

Note: \*Reported within 28 days post dose 1. <sup>¶</sup>Reported within 28 days post dose 2. <sup>†</sup>P value of the comparison of incidence rate among three groups.

**Table 3-5 Adverse Reactions Post Two Doses of 0/14 Schedule in the Phase 2 Clinical Trial**

| Adverse reactions               | 3 µg group<br>(N=120) | 6 µg group<br>(N=120) | Placebo group<br>(N=60) | Total<br>(N=300) | P value† |
|---------------------------------|-----------------------|-----------------------|-------------------------|------------------|----------|
| <b>Total</b>                    | 40(33.3)              | 42(35.0)              | 13(21.7)                | 95(31.7)         | 0.1626   |
| Grade 1                         | 39(32.5)              | 42(35.0)              | 13(21.7)                | 94(31.3)         | 0.1774   |
| <b>Solicited</b>                | 39(32.5)              | 40(33.3)              | 13(21.7)                | 92(30.7)         | 0.2455   |
| <b>Unsolicited</b>              | 3(2.5)                | 3(2.5)                | 0(0.0)                  | 6(2.0)           | 0.6564   |
| <b>Systemic reactions</b>       | 19(15.8)              | 16(13.3)              | 9(15.0)                 | 44(14.7)         | 0.8695   |
| Fatigue                         | 4(3.3)                | 7(5.8)                | 6(10.0)                 | 17(5.7)          | 0.1761   |
| Fever                           | 4(3.3)                | 1(0.8)                | 1(1.7)                  | 6(2.0)           | 0.4505   |
| Diarrhea                        | 6(5.0)                | 1(0.8)                | 1(1.7)                  | 8(2.7)           | 0.1577   |
| Nausea                          | 2(1.7)                | 3(2.5)                | 0(0.0)                  | 5(1.7)           | 0.6373   |
| Headache                        | 2(1.7)                | 4(3.3)                | 1(1.7)                  | 7(2.3)           | 0.7074   |
| Muscle pain                     | 3(2.5)                | 2(1.7)                | 1(1.7)                  | 6(2.0)           | 1.0000   |
| Cough                           | 0(0.0)                | 2(1.7)                | 0(0.0)                  | 2(0.7)           | 0.3579   |
| Hypersensitivity                | 0(0.0)                | 1(0.8)                | 0(0.0)                  | 1(0.3)           | 1.0000   |
| Vomiting                        | 1(0.8)                | 0(0.0)                | 0(0.0)                  | 1(0.3)           | 1.0000   |
| Chest pain                      | 1(0.8)                | 1(0.8)                | 0(0.0)                  | 2(0.7)           | 1.0000   |
| Drowsiness                      | 0(0.0)                | 1(0.8)                | 0(0.0)                  | 1(0.3)           | 1.0000   |
| Dizziness                       | 1(0.8)                | 0(0.0)                | 0(0.0)                  | 1(0.3)           | 1.0000   |
| Decreased appetite              | 1(0.8)                | 0(0.0)                | 0(0.0)                  | 1(0.3)           | 1.0000   |
| Palpitations                    | 0(0.0)                | 1(0.8)                | 0(0.0)                  | 1(0.3)           | 1.0000   |
| <b>Injection-site reactions</b> | 28(23.3)              | 33(27.5)              | 6(10.0)                 | 67(22.3)         | 0.0218   |
| Pain                            | 25(20.8)              | 31(25.8)              | 6(10.0)                 | 62(20.7)         | 0.0427   |
| Swelling                        | 2(1.7)                | 3(2.5)                | 0(0.0)                  | 5(1.7)           | 0.6373   |
| Redness                         | 1(0.8)                | 2(1.7)                | 0(0.0)                  | 3(1.0)           | 0.8061   |
| Hypoaesthesia                   | 1(0.8)                | 1(0.8)                | 0(0.0)                  | 2(0.7)           | 1.0000   |
| Discolouration                  | 0(0.0)                | 1(0.8)                | 0(0.0)                  | 1(0.3)           | 1.0000   |
| Pruritus                        | 1(0.8)                | 1(0.8)                | 0(0.0)                  | 2(0.7)           | 1.0000   |
| Induration                      | 1(0.8)                | 0(0.0)                | 0(0.0)                  | 1(0.3)           | 1.0000   |

Note: data in the table were reported within 28 days post any of the two doses.

†P value of the comparison of incidence rate among three groups.



**Table 3-6 Adverse Reactions Post Dose 1 and Dose 2 of 0/14 Schedule in the Phase 2 Clinical Trial**

| Adverse reactions               | Dose 1*               |                       |                         |                  |          | Dose 2¶               |                       |                         |                  |          |
|---------------------------------|-----------------------|-----------------------|-------------------------|------------------|----------|-----------------------|-----------------------|-------------------------|------------------|----------|
|                                 | 3 µg group<br>(N=120) | 6 µg group<br>(N=120) | Placebo group<br>(N=60) | Total<br>(N=300) | P value† | 3 µg group<br>(N=120) | 6 µg group<br>(N=119) | Placebo group<br>(N=60) | Total<br>(N=299) | P value† |
| <b>Total</b>                    | 24(20.0)              | 29(24.2)              | 10(16.7)                | 63(21.0)         | 0.5182   | 20(16.7)              | 20(16.8)              | 6(10.0)                 | 46(15.4)         | 0.4429   |
| Grade 1                         | 24(20.0)              | 29(24.2)              | 10(16.7)                | 63(21.0)         | 0.5182   | 19(15.8)              | 20(16.8)              | 6(10.0)                 | 45(15.1)         | 0.5010   |
| <b>Solicited</b>                | 23(19.2)              | 27(22.5)              | 10(16.7)                | 60(20.0)         | 0.6558   | 19(15.8)              | 20(16.8)              | 6(10.0)                 | 45(15.1)         | 0.5010   |
| <b>Unsolicited</b>              | 2(1.7)                | 3(2.5)                | 0(0.0)                  | 5(1.7)           | 0.6373   | 1(0.8)                | 0(0.0)                | 0(0.0)                  | 1(0.3)           | 1.0000   |
| <b>Systemic reactions</b>       | 15(12.5)              | 13(10.8)              | 6(10.0)                 | 34(11.3)         | 0.9135   | 5(4.2)                | 6(5.0)                | 4(6.7)                  | 15(5.1)          | 0.6955   |
| Fatigue                         | 2(1.7)                | 6(5.0)                | 4(6.7)                  | 12(4.0)          | 0.2059   | 2(1.7)                | 2(1.7)                | 3(5.0)                  | 7(2.3)           | 0.3762   |
| Fever                           | 3(2.5)                | 1(0.8)                | 1(1.7)                  | 5(1.7)           | 0.8438   | 2(1.7)                | 0(0.0)                | 0(0.0)                  | 2(0.7)           | 0.5179   |
| Diarrhea                        | 5(4.2)                | 1(0.8)                | 0(0.0)                  | 6(2.0)           | 0.1449   | 1(0.8)                | 0(0.0)                | 1(1.7)                  | 2(0.7)           | 0.6795   |
| Nausea                          | 2(1.7)                | 2(1.7)                | 0(0.0)                  | 4(1.3)           | 0.6892   | 0(0.0)                | 1(0.8)                | 0(0.0)                  | 1(0.3)           | 0.5987   |
| Headache                        | 1(0.8)                | 1(0.8)                | 1(1.7)                  | 3(1.0)           | 1.0000   | 1(0.8)                | 3(2.5)                | 0(0.0)                  | 4(1.3)           | 0.4329   |
| Muscle pain                     | 3(2.5)                | 1(0.8)                | 1(1.7)                  | 5(1.7)           | 0.8438   | 0(0.0)                | 2(1.7)                | 1(1.7)                  | 3(1.0)           | 0.3249   |
| Cough                           | 0(0.0)                | 2(1.7)                | 0(0.0)                  | 2(0.7)           | 0.3579   | -                     | -                     | -                       | -                | -        |
| Hypersensitivity                | 0(0.0)                | 1(0.8)                | 0(0.0)                  | 1(0.3)           | 1.0000   | -                     | -                     | -                       | -                | -        |
| Vomiting                        | 1(0.8)                | 0(0.0)                | 0(0.0)                  | 1(0.3)           | 1.0000   | -                     | -                     | -                       | -                | -        |
| Chest pain                      | 0(0.0)                | 1(0.8)                | 0(0.0)                  | 1(0.3)           | 1.0000   | -                     | -                     | -                       | -                | -        |
| Drowsiness                      | 0(0.0)                | 1(0.8)                | 0(0.0)                  | 1(0.3)           | 1.0000   | -                     | -                     | -                       | -                | -        |
| Dizziness                       | 1(0.8)                | 0(0.0)                | 0(0.0)                  | 1(0.3)           | 1.0000   | -                     | -                     | -                       | -                | -        |
| Decreased appetite              | 1(0.8)                | 0(0.0)                | 0(0.0)                  | 1(0.3)           | 1.0000   | -                     | -                     | -                       | -                | -        |
| Palpitations                    | 0(0.0)                | 1(0.8)                | 0(0.0)                  | 1(0.3)           | 1.0000   | -                     | -                     | -                       | -                | -        |
| <b>Injection-site reactions</b> | 13(10.8)              | 21(17.5)              | 6(10.0)                 | 40(13.3)         | 0.3661   | 17(14.2)              | 15(12.6)              | 2(3.3)                  | 34(11.4)         | 0.0816   |
| Pain                            | 11(9.2)               | 20(16.7)              | 6(10.0)                 | 37(12.3)         | 0.1945   | 16(13.3)              | 14(11.8)              | 2(3.3)                  | 32(10.7)         | 0.0896   |
| Swelling                        | 1(0.8)                | 0(0.0)                | 0(0.0)                  | 1(0.3)           | 1.0000   | 1(0.8)                | 3(2.5)                | 0(0.0)                  | 4(1.3)           | 0.4329   |
| Redness                         | 1(0.8)                | 0(0.0)                | 0(0.0)                  | 1(0.3)           | 1.0000   | 0(0.0)                | 2(1.7)                | 0(0.0)                  | 2(0.7)           | 0.1973   |
| Hypoaesthesia                   | 1(0.8)                | 1(0.8)                | 0(0.0)                  | 2(0.7)           | 1.0000   | -                     | -                     | -                       | -                | -        |
| Discolouration                  | -                     | -                     | -                       | -                | -        | 1(0.8)                | 0(0.0)                | 0(0.0)                  | 1(0.3)           | 1.0000   |
| Pruritus                        | -                     | -                     | -                       | -                | -        | 1(0.8)                | 1(0.8)                | 0(0.0)                  | 2(0.7)           | 1.0000   |
| Induration                      | -                     | -                     | -                       | -                | -        | 1(0.8)                | 1(0.8)                | 0(0.00)                 | 2(0.7)           | 1.0000   |

Note: \*Reported within 14 days post dose 1. ¶Reported within 28 days post dose 2. †P value of the comparison of incidence rate among three groups.

**Table 3-7 Adverse Reactions Post Two Doses of 0/28 Schedule in the Phase 2 Clinical Trial**

| Adverse reactions               | 3 µg group<br>(N=120) | 6 µg group<br>(N=120) | Placebo group<br>(N=60) | Total<br>(N=300) | P value† |
|---------------------------------|-----------------------|-----------------------|-------------------------|------------------|----------|
| <b>Total</b>                    | 23(19.2)              | 23(19.2)              | 11(18.3)                | 57(19.0)         | 1.0000   |
| Grade 1                         | 23(19.2)              | 23(19.2)              | 11(18.3)                | 57(19.0)         | 1.0000   |
| <b>Solicited</b>                | 23(19.2)              | 23(19.2)              | 10(16.7)                | 56(18.7)         | 0.9437   |
| <b>Unsolicited</b>              | 0(0.0)                | 1(0.8)                | 1(1.7)                  | 2(0.7)           | 0.6789   |
| <b>Systemic reactions</b>       | 14(11.7)              | 12(10.0)              | 6(10.0)                 | 32(10.7)         | 0.9135   |
| Fatigue                         | 10(8.3)               | 3(2.5)                | 2(3.3)                  | 15(5.0)          | 0.1393   |
| Fever                           | 4(3.3)                | 4(3.3)                | 1(1.7)                  | 9(3.0)           | 0.8300   |
| Diarrhea                        | 1(0.8)                | 3(2.5)                | 1(1.7)                  | 5(1.7)           | 0.8438   |
| Nausea                          | 2(1.7)                | 0(0.0)                | 0(0.0)                  | 2(0.7)           | 0.3579   |
| Headache                        | 3(2.5)                | 1(0.8)                | 0(0.0)                  | 4(1.3)           | 0.5351   |
| Muscle pain                     | 2(1.7)                | 4(3.3)                | 3(5.0)                  | 9(3.0)           | 0.4557   |
| Hypersensitivity                | 1(0.8)                | 0(0.0)                | 0(0.0)                  | 1(0.3)           | 1.0000   |
| Decreased appetite              | 0(0.0)                | 1(0.8)                | 0(0.0)                  | 1(0.3)           | 1.0000   |
| Cough                           | 1(0.8)                | 0(0.0)                | 0(0.0)                  | 1(0.3)           | 1.0000   |
| <b>Injection-site reactions</b> | 12(10.0)              | 16(13.3)              | 7(11.7)                 | 35(11.7)         | 0.7335   |
| Pain                            | 12(10.0)              | 13(10.8)              | 6(10.0)                 | 31(10.3)         | 1.0000   |
| Redness                         | 0(0.0)                | 1(0.8)                | 0(0.0)                  | 1(0.3)           | 1.0000   |
| Discolouration                  | 0(0.0)                | 1(0.8)                | 1(1.7)                  | 2(0.7)           | 0.6789   |
| Pruritus                        | 0(0.0)                | 1(0.8)                | 0(0.0)                  | 1(0.3)           | 1.0000   |
| Swelling                        | 0(0.0)                | 1(0.8)                | 1(1.7)                  | 2(0.7)           | 0.6789   |

Note: data in the table were reported within 28 days post any of the two doses.

†P value of the comparison of incidence rate among three groups.

**Table 3-8 Adverse Reactions Post Dose 1 and Dose 2 of 0/28 Schedule in the Phase 2 Clinical Trial**

| Adverse reactions | Dose 1*               |                       |                         |                  | P value† | Dose 2¶               |                       |                         |                  | P value† |
|-------------------|-----------------------|-----------------------|-------------------------|------------------|----------|-----------------------|-----------------------|-------------------------|------------------|----------|
|                   | 3 µg group<br>(N=120) | 6 µg group<br>(N=120) | Placebo group<br>(N=60) | Total<br>(N=300) |          | 3 µg group<br>(N=117) | 6 µg group<br>(N=118) | Placebo group<br>(N=61) | Total<br>(N=296) |          |
| <b>Total</b>      | 22(18.3)              | 21(17.5)              | 10(16.7)                | 53(17.7)         | 0.9803   | 7(6.0)                | 10(8.5)               | 2(3.3)                  | 19(6.4)          | 0.4407   |

| Adverse reactions               | Dose 1*               |                       |                         |                  |          | Dose 2¶               |                       |                         |                  |          |
|---------------------------------|-----------------------|-----------------------|-------------------------|------------------|----------|-----------------------|-----------------------|-------------------------|------------------|----------|
|                                 | 3 µg group<br>(N=120) | 6 µg group<br>(N=120) | Placebo group<br>(N=60) | Total<br>(N=300) | P value† | 3 µg group<br>(N=117) | 6 µg group<br>(N=118) | Placebo group<br>(N=61) | Total<br>(N=296) | P value† |
| Grade 1                         | 22(18.3)              | 20(16.7)              | 10(16.7)                | 52(17.3)         | 0.9409   | 7(6.0)                | 10(8.5)               | 2(3.3)                  | 19(6.4)          | 0.4407   |
| <b>Solicited</b>                | 22(18.3)              | 21(17.5)              | 9(15.0)                 | 52(17.3)         | 0.9025   | 7(6.0)                | 10(8.5)               | 2(3.3)                  | 19(6.4)          | 0.4407   |
| <b>Unsolicited</b>              | 0(0.0)                | 1(0.8)                | 1(1.7)                  | 2(0.7)           | 0.6789   | 0(0.0)                | 0(0.0)                | 0(0.0)                  | 0(0.0)           | -        |
| <b>Systemic reactions</b>       | 14(11.7)              | 10(8.3)               | 6(10.0)                 | 30(10.0)         | 0.7019   | 4(3.4)                | 3(2.5)                | 0(0.0)                  | 7(2.4)           | 0.4798   |
| Fatigue                         | 10(8.3)               | 2(1.7)                | 2(3.3)                  | 14(4.7)          | 0.0454   | 3(2.6)                | 1(0.9)                | 0(0.0)                  | 4(1.4)           | 0.4379   |
| Fever                           | 4(3.3)                | 3(2.5)                | 1(1.7)                  | 8(2.7)           | 0.9057   | 0(0.0)                | 2(1.7)                | 0(0.0)                  | 2(0.7)           | 0.3555   |
| Diarrhea                        | 1(0.8)                | 2(1.7)                | 1(1.7)                  | 4(1.3)           | 1.0000   | 0(0.0)                | 1(0.9)                | 0(0.0)                  | 1(0.3)           | 1.0000   |
| Nausea                          | 2(1.7)                | 0(0.0)                | 0(0.0)                  | 2(0.7)           | 0.3579   | 1(0.9)                | 0(0.0)                | 0(0.0)                  | 1(0.3)           | 0.6014   |
| Headache                        | 3(2.5)                | 1(0.8)                | 0(0.0)                  | 4(1.3)           | 0.5351   | 2(1.7)                | 0(0.0)                | 0(0.0)                  | 2(0.7)           | 0.1973   |
| Muscle pain                     | 2(1.7)                | 4(3.3)                | 3(5.0)                  | 9(3.0)           | 0.4557   | -                     | -                     | -                       | -                | -        |
| Hypersensitivity                | 1(0.8)                | 0(0.0)                | 0(0.0)                  | 1(0.3)           | 1.0000   | -                     | -                     | -                       | -                | -        |
| Decreased appetite              | 0(0.0)                | 1(0.8)                | 0(0.0)                  | 1(0.3)           | 1.0000   | -                     | -                     | -                       | -                | -        |
| Cough                           | -                     | -                     | -                       | -                | -        | 1(0.9)                | 0(0.0)                | 0(0.0)                  | 1(0.3)           | 0.6014   |
| <b>Injection-site reactions</b> | 9(7.5)                | 15(12.5)              | 5(8.3)                  | 29(9.7)          | 0.4436   | 3(2.6)                | 8(6.8)                | 2(3.3)                  | 13(4.4)          | 0.3245   |
| Pain                            | 9(7.5)                | 12(10.0)              | 4(6.7)                  | 25(8.3)          | 0.7650   | 3(2.6)                | 7(5.9)                | 2(3.3)                  | 12(4.1)          | 0.4786   |
| Redness                         | 0(0.0)                | 1(0.8)                | 0(0.0)                  | 1(0.3)           | 1.0000   | -                     | -                     | -                       | -                | -        |
| Discolouration                  | 0(0.0)                | 1(0.8)                | 1(1.7)                  | 2(0.7)           | 0.6789   | -                     | -                     | -                       | -                | -        |
| Pruritus                        | 0(0.0)                | 1(0.8)                | 0(0.0)                  | 1(0.3)           | 1.0000   | -                     | -                     | -                       | -                | -        |
| Swelling                        | -                     | -                     | -                       | -                | -        | 0(0.0)                | 1(0.9)                | 1(1.6)                  | 2(0.7)           | 0.6838   |

Note: \*Reported within 28 days post dose 1. ¶Reported within 28 days post dose 2. †P value of the comparison of incidence rate among three groups.

**Table 3-9 Adverse Reactions Post Dose 1 and Dose 2 of 0/14 Schedule in the Phase 1&2 Clinical Trial**

|                                 | <b>3 µg group<br/>(N=144)</b> | <b>6 µg group<br/>(N=144)</b> | <b>Placebo group<br/>(N=84)</b> | <b>Total<br/>(N=372)</b> | <b>P value†</b> |
|---------------------------------|-------------------------------|-------------------------------|---------------------------------|--------------------------|-----------------|
| <b>Total</b>                    | 47(32.6)                      | 51(35.4)                      | 15(17.9)                        | 113(30.4)                | 0.0136          |
| <b>Grade 1</b>                  | 46(31.9)                      | 51(35.4)                      | 15(17.9)                        | 112(30.1)                | 0.0144          |
| <b>Solicited</b>                | 45(31.3)                      | 49(34.0)                      | 15(17.9)                        | 109(29.3)                | 0.0256          |
| <b>Unsolicited</b>              | 4(2.8)                        | 5(3.5)                        | 0(0.0)                          | 9(2.4)                   | 0.2609          |
| <b>Systemic reactions</b>       | 22(15.3)                      | 20(13.9)                      | 10(11.9)                        | 52(14.0)                 | 0.8261          |
| Fatigue                         | 6(4.2)                        | 10(6.9)                       | 7(8.3)                          | 23(6.2)                  | 0.4038          |
| Fever                           | 4(2.8)                        | 2(1.4)                        | 1(1.2)                          | 7(1.9)                   | 0.7027          |
| Diarrhea                        | 6(4.2)                        | 2(1.4)                        | 1(1.2)                          | 9(2.4)                   | 0.3174          |
| Nausea                          | 2(1.4)                        | 3(2.1)                        | 0(0.0)                          | 5(1.3)                   | 0.4630          |
| Headache                        | 2(1.4)                        | 4(2.8)                        | 1(1.2)                          | 7(1.9)                   | 0.7027          |
| Muscle pain                     | 3(2.1)                        | 2(1.4)                        | 1(1.2)                          | 6(1.6)                   | 1.0000          |
| Cough                           | 0(0.0)                        | 2(1.4)                        | 0(0.0)                          | 2(0.5)                   | 0.3480          |
| Hypersensitivity                | 0(0.0)                        | 2(1.4)                        | 0(0.0)                          | 2(0.5)                   | 0.3489          |
| Vomiting                        | 1(0.7)                        | 0(0.0)                        | 0(0.0)                          | 1(0.3)                   | 1.0000          |
| Chest pain                      | 0(0.0)                        | 1(0.7)                        | 0(0.0)                          | 1(0.3)                   | 1.0000          |
| Abdominal pain                  | 0(0.0)                        | 1(0.7)                        | 0(0.0)                          | 1(0.3)                   | 1.0000          |
| Lower abdominal pain            | 1(0.7)                        | 0(0.0)                        | 0(0.0)                          | 1(0.3)                   | 1.0000          |
| Drowsiness                      | 0(0.0)                        | 1(0.7)                        | 0(0.0)                          | 1(0.3)                   | 1.0000          |
| Dizziness                       | 1(0.7)                        | 0(0.0)                        | 0(0.0)                          | 1(0.3)                   | 1.0000          |
| Decreased appetite              | 1(0.7)                        | 0(0.0)                        | 0(0.0)                          | 1(0.3)                   | 1.0000          |
| Palpitations                    | 0(0.0)                        | 1(0.7)                        | 0(0.0)                          | 1(0.3)                   | 1.0000          |
| <b>Injection-site reactions</b> | 32(22.2)                      | 38(26.4)                      | 7(8.3)                          | 77(20.7)                 | 0.0025          |
| Pain                            | 29(20.1)                      | 36(25.0)                      | 7(8.3)                          | 72(19.4)                 | 0.0057          |
| Swelling                        | 2(1.4)                        | 3(2.1)                        | 0(0.0)                          | 5(1.3)                   | 0.4630          |
| Redness                         | 1(0.7)                        | 2(1.4)                        | 0(0.0)                          | 3(0.8)                   | 0.7953          |
| Discolouration                  | 1(0.7)                        | 1(0.7)                        | 0(0.0)                          | 2(0.5)                   | 1.0000          |
| Pruritus                        | 1(0.7)                        | 1(0.7)                        | 0(0.0)                          | 2(0.5)                   | 1.0000          |
| Induration                      | 1(0.7)                        | 1(0.7)                        | 0(0.0)                          | 2(0.5)                   | 1.0000          |
| Hypoesthesia                    | 1(0.7)                        | 1(0.7)                        | 0(0.0)                          | 2(0.5)                   | 1.0000          |

Note: data in the table were reported within 28 days post any of the two doses.

†P value of the comparison of incidence rate among three groups.



**Table 3-10 Adverse Reactions Post Dose 1 and Dose 2 of 0/14 Schedule in the Phase 1&2 Clinical Trial**

| Adverse reactions               | Dose 1*               |                       |                         |                  |               | Dose 2†               |                       |                         |                  |               |
|---------------------------------|-----------------------|-----------------------|-------------------------|------------------|---------------|-----------------------|-----------------------|-------------------------|------------------|---------------|
|                                 | 3 µg group<br>(N=144) | 6 µg group<br>(N=144) | Placebo group<br>(N=84) | Total<br>(N=372) | P value‡      | 3 µg group<br>(N=144) | 6 µg group<br>(N=143) | Placebo group<br>(N=84) | Total<br>(N=371) | P value‡      |
| <b>Total</b>                    | <b>31(21.5)</b>       | <b>35(24.3)</b>       | <b>12(14.3)</b>         | <b>78(21.0)</b>  | <b>0.1861</b> | <b>21(14.6)</b>       | <b>25(17.5)</b>       | <b>7(8.3)</b>           | <b>53(14.3)</b>  | <b>0.1519</b> |
| Grade 1                         | 31(21.5)              | 35(24.3)              | 12(14.3)                | 78(21.0)         | 0.1861        | 20(13.9)              | 25(17.5)              | 7(8.3)                  | 52(14.0)         | 0.1535        |
| <b>Solicited</b>                | <b>29(20.1)</b>       | <b>33(22.9)</b>       | <b>12(14.3)</b>         | <b>74(19.9)</b>  | <b>0.2909</b> | <b>20(13.9)</b>       | <b>25(17.5)</b>       | <b>7(8.3)</b>           | <b>52(14.0)</b>  | <b>0.1535</b> |
| <b>Unsolicited</b>              | <b>3(2.1)</b>         | <b>5(3.5)</b>         | <b>0(0.0)</b>           | <b>8(2.2)</b>    | <b>0.2285</b> | <b>1(0.7)</b>         | <b>0(0.0)</b>         | <b>0(0.0)</b>           | <b>1(0.3)</b>    | <b>1.0000</b> |
| <b>Systemic reactions</b>       | <b>18(12.5)</b>       | <b>17(11.8)</b>       | <b>7(8.3)</b>           | <b>44(11.8)</b>  | <b>0.8155</b> | <b>5(3.5)</b>         | <b>8(5.6)</b>         | <b>5(6.0)</b>           | <b>18(5.0)</b>   | <b>0.6132</b> |
| Fatigue                         | 4(2.8)                | 7(4.9)                | 5(6.0)                  | 16(4.3)          | 0.4606        | 2(1.4)                | 4(2.8)                | 4(4.8)                  | 10(2.7)          | 0.2646        |
| Fever                           | 3(2.1)                | 2(1.4)                | 1(1.2)                  | 6(1.6)           | 1.0000        | 2(1.4)                | 0(0.0)                | 0(0.0)                  | 2(0.5)           | 0.3487        |
| Diarrhea                        | 5(3.5)                | 2(1.4)                | 0(0.0)                  | 7(1.9)           | 0.1680        | 1(0.7)                | 0(0.0)                | 1(1.2)                  | 2(0.5)           | 0.7000        |
| Nausea                          | 2(1.4)                | 2(1.4)                | 0(0.0)                  | 4(1.1)           | 0.6827        | 0(0.0)                | 1(0.7)                | 0(0.0)                  | 1(0.3)           | 0.6119        |
| Headache                        | 1(0.7)                | 1(0.7)                | 1(1.2)                  | 3(0.8)           | 1.0000        | 1(0.7)                | 3(2.1)                | 0(0.0)                  | 4(1.1)           | 0.3659        |
| Muscle pain                     | 3(2.1)                | 1(0.7)                | 1(1.2)                  | 5(1.3)           | 0.8459        | 0(0.0)                | 2(1.4)                | 1(1.2)                  | 3(0.8)           | 0.3451        |
| Cough                           | 0(0.0)                | 2(1.4)                | 0(0.0)                  | 2(0.5)           | 0.3489        | -                     | -                     | -                       | -                | -             |
| Hypersensitivity                | 0(0.0)                | 2(1.4)                | 0(0.0)                  | 2(0.5)           | 0.3489        | -                     | -                     | -                       | -                | -             |
| Vomiting                        | 1(0.7)                | 0(0.0)                | 0(0.0)                  | 1(0.3)           | 1.0000        | -                     | -                     | -                       | -                | -             |
| Chest pain                      | 0(0.0)                | 1(0.7)                | 0(0.0)                  | 1(0.3)           | 1.0000        | -                     | -                     | -                       | -                | -             |
| Abdominal pain                  | 0(0.0)                | 1(0.7)                | 0(0.0)                  | 1(0.3)           | 1.0000        | -                     | -                     | -                       | -                | -             |
| Lower abdominal pain            | 1(0.7)                | 0(0.0)                | 0(0.0)                  | 1(0.3)           | 1.0000        | -                     | -                     | -                       | -                | -             |
| Drowsiness                      | 0(0.0)                | 1(0.7)                | 0(0.0)                  | 1(0.3)           | 1.0000        | -                     | -                     | -                       | -                | -             |
| Dizziness                       | 1(0.7)                | 0(0.0)                | 0(0.0)                  | 1(0.3)           | 1.0000        | -                     | -                     | -                       | -                | -             |
| Decrease appetite               | 1(0.7)                | 0(0.0)                | 0(0.0)                  | 1(0.3)           | 1.0000        | -                     | -                     | -                       | -                | -             |
| Palpitations                    | 0(0.0)                | 1(0.7)                | 0(0.0)                  | 1(0.3)           | 1.0000        | -                     | -                     | -                       | -                | -             |
| <b>Injection-site reactions</b> | <b>18(12.5)</b>       | <b>27(18.8)</b>       | <b>7(8.3)</b>           | <b>52(14.0)</b>  | <b>0.2196</b> | <b>18(12.5)</b>       | <b>18(12.6)</b>       | <b>2(2.4)</b>           | <b>38(10.2)</b>  | <b>0.0157</b> |
| Pain                            | 15(10.4)              | 24(16.7)              | 7(8.3)                  | 46(12.4)         | 0.1364        | 17(11.8)              | 17(11.9)              | 2(2.4)                  | 36(9.7)          | 0.0224        |
| Swelling                        | 1(0.7)                | 0(0.0)                | 0(0.0)                  | 1(0.3)           | 1.0000        | 1(0.7)                | 3(2.1)                | 0(0.0)                  | 4(1.1)           | 0.3659        |
| Erythema                        | 1(0.7)                | 0(0.0)                | 0(0.0)                  | 1(0.3)           | 1.0000        | 0(0.0)                | 2(1.4)                | 0(0.0)                  | 2(0.5)           | 0.1987        |
| Discolouration                  | 0(0.0)                | 1(0.7)                | 0(0.0)                  | 1(0.3)           | 1.0000        | 1(0.7)                | 0(0.0)                | 0(0.0)                  | 1(0.3)           | 1.0000        |
| Hypoesthesia                    | 1(0.7)                | 1(0.7)                | 0(0.0)                  | 2(0.5)           | 1.0000        | -                     | -                     | -                       | -                | -             |
| Pruritus                        | -                     | -                     | -                       | -                | -             | 1(0.7)                | 1(0.7)                | 0(0.0)                  | 2(0.5)           | 1.0000        |
| Induration                      | -                     | -                     | -                       | -                | -             | 1(0.7)                | 1(0.7)                | 0(0.0)                  | 2(0.5)           | 1.0000        |

---

Note: \*Reported within 14 days post dose 1. ¶Reported within 28 days post dose 2. †P value of the comparison of incidence rate among three groups.

**Table 3-11 Adverse Reactions Post Two doses of 0/28 Schedule in the Phase 1&2 Clinical Trial**

|                                 | <b>3 µg group<br/>(N=144)</b> | <b>6 µg group<br/>(N=144)</b> | <b>Placebo group<br/>(N=83)</b> | <b>Total<br/>(N=371)</b> | <b>P value†</b> |
|---------------------------------|-------------------------------|-------------------------------|---------------------------------|--------------------------|-----------------|
| <b>Total</b>                    | 26(18.1)                      | 27(18.8)                      | 14(16.9)                        | 67(18.1)                 | 0.9546          |
| <b>Grade 1</b>                  | 26(18.1)                      | 27(18.8)                      | 14(16.9)                        | 67(18.1)                 | 0.9546          |
| <b>Solicited</b>                | 26(18.1)                      | 27(18.8)                      | 13(15.7)                        | 66(17.8)                 | 0.8538          |
| <b>Unsolicited</b>              | 0(0.0)                        | 1(0.7)                        | 2(2.4)                          | 3(0.8)                   | 0.2424          |
| <b>Systemic reactions</b>       | 16(11.1)                      | 14(9.7)                       | 7(8.4)                          | 37(10.0)                 | 0.8152          |
| Fatigue                         | 10(6.9)                       | 4(2.8)                        | 2(2.4)                          | 16(4.3)                  | 0.1737          |
| Fever                           | 4(2.8)                        | 5(3.5)                        | 2(2.4)                          | 11(3.0)                  | 1.0000          |
| Diarrhea                        | 2(1.4)                        | 3(2.1)                        | 1(1.2)                          | 6(1.6)                   | 1.0000          |
| Nausea                          | 2(1.4)                        | 0(0.0)                        | 0(0.0)                          | 2(0.5)                   | 0.3496          |
| Headache                        | 3(2.1)                        | 1(0.7)                        | 0(0.0)                          | 4(1.1)                   | 0.4558          |
| Cough                           | 3(2.1)                        | 0(0.0)                        | 0(0.0)                          | 3(0.8)                   | 0.1263          |
| Muscle pain                     | 2(1.4)                        | 4(2.8)                        | 3(3.6)                          | 9(2.4)                   | 0.4713          |
| Hypersensitivity                | 1(0.7)                        | 0(0.0)                        | 0(0.0)                          | 1(0.3)                   | 1.0000          |
| Decrease appetite               | 0(0.0)                        | 1(0.7)                        | 0(0.0)                          | 1(0.3)                   | 1.0000          |
| <b>Injection-site reactions</b> | 15(10.4)                      | 19(13.2)                      | 10(12.1)                        | 44(11.9)                 | 0.7686          |
| Pain                            | 15(10.4)                      | 16(11.1)                      | 9(10.8)                         | 40(10.8)                 | 1.0000          |
| Redness                         | 0(0.0)                        | 1(0.7)                        | 0(0.0)                          | 1(0.3)                   | 1.0000          |
| Discolouration                  | 0(0.0)                        | 1(0.7)                        | 2(2.4)                          | 3(0.8)                   | 0.2424          |
| Pruritus                        | 0(0.0)                        | 1(0.7)                        | 0(0.0)                          | 1(0.3)                   | 1.0000          |
| Swelling                        | 0(0.0)                        | 1(0.7)                        | 1(1.2)                          | 2(0.5)                   | 0.6979          |

Note: data in the table were reported within 28 days post any of the two doses.

†P value of the comparison of incidence rate among three groups.

**Table 3-12 Adverse Reactions Post Dose 1 and Dose 2 of 0/28 Schedule in the Phase 1&2 Clinical Trial**

| <b>Adverse reactions</b> | <b>Dose 1*</b>                |                               |                                 |                          | <b>P value†</b> | <b>Dose 2‡</b>                |                               |                                 |                          | <b>P value†</b> |
|--------------------------|-------------------------------|-------------------------------|---------------------------------|--------------------------|-----------------|-------------------------------|-------------------------------|---------------------------------|--------------------------|-----------------|
|                          | <b>3 µg group<br/>(N=144)</b> | <b>6 µg group<br/>(N=144)</b> | <b>Placebo group<br/>(N=83)</b> | <b>Total<br/>(N=371)</b> |                 | <b>3 µg group<br/>(N=141)</b> | <b>6 µg group<br/>(N=142)</b> | <b>Placebo group<br/>(N=84)</b> | <b>Total<br/>(N=367)</b> |                 |
| <b>Total</b>             | 25(17.4)                      | 24(16.7)                      | 12(14.5)                        | 61(16.4)                 | 0.8744          | 9(6.4)                        | 11(7.8)                       | 3(3.6)                          | 23(6.3)                  | 0.5107          |
| <b>Grade 1</b>           | 25(17.4)                      | 23(16.0)                      | 12(14.5)                        | 60(16.2)                 | 0.8727          | 9(6.4)                        | 11(7.8)                       | 3(3.6)                          | 23(6.3)                  | 0.5107          |
| <b>Solicited</b>         | 25(17.4)                      | 24(16.7)                      | 11(13.3)                        | 60(16.2)                 | 0.7112          | 9(6.4)                        | 11(7.8)                       | 3(3.6)                          | 23(6.3)                  | 0.5107          |
| <b>Unsolicited</b>       | 0(0.0)                        | 1(0.7)                        | 2(2.4)                          | 3(0.8)                   | 0.2424          | 0(0.0)                        | 0(0.0)                        | 0(0.0)                          | 0(0.0)                   | -               |



| Adverse reactions               | Dose 1*               |                       |                         |                  |          | Dose 2¶               |                       |                         |                  |          |
|---------------------------------|-----------------------|-----------------------|-------------------------|------------------|----------|-----------------------|-----------------------|-------------------------|------------------|----------|
|                                 | 3 µg group<br>(N=144) | 6 µg group<br>(N=144) | Placebo group<br>(N=83) | Total<br>(N=371) | P value† | 3 µg group<br>(N=141) | 6 µg group<br>(N=142) | Placebo group<br>(N=84) | Total<br>(N=367) | P value† |
| <b>Systemic reactions</b>       | 15(10.4)              | 11(7.6)               | 7(8.4)                  | 33(8.9)          | 0.7130   | 5(3.6)                | 4(2.8)                | 0(0.0)                  | 9(2.5)           | 0.2373   |
| Fatigue                         | 10(6.9)               | 2(1.4)                | 2(2.4)                  | 14(3.8)          | 0.0392   | 3(2.1)                | 2(1.4)                | 0(0.0)                  | 5(1.4)           | 0.3756   |
| Fever                           | 4(2.8)                | 4(2.8)                | 2(2.4)                  | 10(2.7)          | 1.0000   | 0(0.0)                | 2(1.4)                | 0(0.0)                  | 2(0.5)           | 0.3479   |
| Diarrhea                        | 2(1.4)                | 2(1.4)                | 1(1.2)                  | 5(1.4)           | 1.0000   | 0(0.0)                | 1(0.7)                | 0(0.0)                  | 1(0.3)           | 1.0000   |
| Nausea                          | 2(1.4)                | 0(0.0)                | 0(0.0)                  | 2(0.5)           | 0.3496   | 1(0.7)                | 0(0.0)                | 0(0.0)                  | 1(0.3)           | 0.6131   |
| Headache                        | 3(2.1)                | 1(0.7)                | 0(0.0)                  | 4(1.1)           | 0.4558   | 2(1.4)                | 0(0.0)                | 0(0.0)                  | 2(0.5)           | 0.1989   |
| Cough                           | 1(0.7)                | 0(0.0)                | 0(0.0)                  | 1(0.3)           | 1.0000   | 2(1.4)                | 0(0.0)                | 0(0.0)                  | 2(0.5)           | 0.1989   |
| Muscle pain                     | 2(1.4)                | 4(2.8)                | 3(3.6)                  | 9(2.4)           | 0.4713   | -                     | -                     | -                       | -                | -        |
| Hypersensitivity                | 1(0.7)                | 0(0.0)                | 0(0.0)                  | 1(0.3)           | 1.0000   | -                     | -                     | -                       | -                | -        |
| Decrease appetite               | 0(0.0)                | 1(0.7)                | 0(0.0)                  | 1(0.3)           | 1.0000   | -                     | -                     | -                       | -                | -        |
| <b>Injection-site reactions</b> | 12(8.3)               | 18(12.5)              | 8(9.6)                  | 38(10.2)         | 0.5088   | 4(2.8)                | 8(5.6)                | 3(3.6)                  | 15(4.1)          | 0.5301   |
| Pain                            | 12(8.3)               | 15(10.4)              | 6(7.2)                  | 33(8.9)          | 0.7538   | 4(2.8)                | 7(4.9)                | 3(3.6)                  | 14(3.8)          | 0.6543   |
| Erythema                        | 0(0.0)                | 1(0.7)                | 0(0.0)                  | 1(0.3)           | 1.0000   | -                     | -                     | -                       | -                | -        |
| Discolouration                  | 0(0.0)                | 1(0.7)                | 2(2.4)                  | 3(0.8)           | 0.2424   | -                     | -                     | -                       | -                | -        |
| Pruritus                        | 0(0.0)                | 1(0.7)                | 0(0.0)                  | 1(0.3)           | 1.0000   | -                     | -                     | -                       | -                | -        |
| Swelling                        | -                     | -                     | -                       | -                | -        | 0(0.0)                | 1(0.7)                | 1(1.2)                  | 2(0.5)           | 0.7019   |

Note: \*Reported within 28 days post dose 1. ¶Reported within 28 days post dose 2. †P value of the comparison of incidence rate among three groups.

## Appendix 4 Laboratory Abnormalities

**Table 4-1 Clinically Significant Laboratory Abnormalities on Day 3 after vaccination in the Cohort of Day 0,14 Schedule in the Phase 1 Clinical Trial.**

| <b>Dose</b>          | <b>Laboratory measures</b>    | <b>3 µg group<br/>(N=24)</b> | <b>6 µg group<br/>(N=24)</b> | <b>Placebo group<br/>(N=24)</b> | <b>Total<br/>(N=72)</b> |
|----------------------|-------------------------------|------------------------------|------------------------------|---------------------------------|-------------------------|
| <b>Total</b>         | <b>Any Laboratory index</b>   | <b>2(8·3)</b>                | <b>2(8·3)</b>                | <b>1(4·2)</b>                   | <b>5(7·0)</b>           |
|                      | Grade 1                       | 2(8·3)                       | 1(4·2)                       | 1(4·2)                          | 4(5·6)                  |
|                      | Grade 3                       | -                            | 1(4·2)                       | -                               | 1(1·4)                  |
|                      | <b>ALT</b>                    |                              |                              |                                 |                         |
|                      | Grade 1                       | -                            | 1(4·2)                       | -                               | 1(1·4)                  |
|                      | <b>AST</b>                    |                              |                              |                                 |                         |
|                      | Grade 1                       | -                            | 1(4·2)                       | -                               | 1(1·4)                  |
|                      | <b>Creatine phosphokinase</b> |                              |                              |                                 |                         |
|                      | Grade 1                       | 1(4·2)                       | -                            | -                               | 1(1·4)                  |
|                      | <b>Urine red cell</b>         |                              |                              |                                 |                         |
| Grade 1              | -                             | -                            | 1(4·2)                       | 1(1·4)                          |                         |
| <b>Urine glucose</b> |                               |                              |                              |                                 |                         |
| Grade 3              | -                             | 1(4·2)                       | -                            | 1(1·4)                          |                         |
| <b>Urine protein</b> |                               |                              |                              |                                 |                         |
| Grade 1              | 1(4·2)                        | -                            | -                            | 1(1·4)                          |                         |
| <b>First</b>         | <b>Laboratory index</b>       | <b>1(4·2)</b>                | <b>1(4·2)</b>                | <b>1(4·2)</b>                   | <b>3(4·2)</b>           |
|                      | Grade 1                       | 1(4·2)                       | -                            | 1(4·2)                          | 2(2·8)                  |
|                      | Grade 3                       | -                            | 1(4·2)                       | -                               | 1(1·4)                  |
|                      | <b>Creatine phosphokinase</b> |                              |                              |                                 |                         |
|                      | Grade 1                       | 1(4·2)                       | -                            | -                               | 1(1·4)                  |
|                      | <b>Urine red cell</b>         |                              |                              |                                 |                         |
|                      | Grade 1                       | -                            | -                            | 1(4·2)                          | 1(1·4)                  |
| <b>Urine glucose</b> |                               |                              |                              |                                 |                         |
| Grade 3              | -                             | 1(4·2)                       | -                            | 1(1·4)                          |                         |
| <b>Second</b>        | <b>Laboratory index</b>       |                              |                              |                                 |                         |
|                      | Grade 1                       | 1(4·2)                       | 1(4·2)                       | -                               | 2(2·8)                  |
|                      | <b>ALT</b>                    |                              |                              |                                 |                         |
|                      | Grade 1                       | -                            | 1(4·2)                       | -                               | 1(1·4)                  |
|                      | <b>AST</b>                    |                              |                              |                                 |                         |
|                      | Grade 1                       | -                            | 1(4·2)                       | -                               | 1(1·4)                  |
| <b>Urine protein</b> |                               |                              |                              |                                 |                         |
| Grade 1              | 1(4·2)                        | -                            | -                            | 1(1·4)                          |                         |

Data are n (%). ALT=alanine aminotransferase. AST=aspartate aminotransferase

Generally, we would assume that the laboratory abnormalities occurred at day 3 were related to the vaccination because of the strong correlation in time.

**Table 4-2 Clinically Significant Laboratory Abnormalities on Day 3 after vaccination in the Cohort of Day 0,28 Schedule in the Phase 1 Clinical Trial.**

| <b>Dose</b>   | <b>Laboratory measures</b>    | <b>3 µg group<br/>(N=24)</b> | <b>6 µg group<br/>(N=24)</b> | <b>Placebo group<br/>(N=23)</b> | <b>Total<br/>(N=71)</b> |
|---------------|-------------------------------|------------------------------|------------------------------|---------------------------------|-------------------------|
| <b>Total</b>  | <b>Any laboratory index</b>   | <b>2(8.3)</b>                | <b>2(8.3)</b>                | <b>1(4.4)</b>                   | <b>5(7.0)</b>           |
|               | Grade 1                       | 2(8.3)                       | 1 (4.2)                      | 1(4.4)                          | 4(5.6)                  |
|               | Grade 2                       | 1(4.2)                       | -                            | 1(4.4)                          | 2(2.8)                  |
|               | Grade 3                       | -                            | 1(4.2)                       | -                               | 1(1.4)                  |
|               | <b>Total bilirubin</b>        | <b>1(4.2)</b>                | -                            | -                               | <b>1(1.4)</b>           |
|               | Grade 1                       | 1(4.2)                       | -                            | -                               | 1(1.4)                  |
|               | Grade 2                       | 1(4.2)                       | -                            | -                               | 1(1.4)                  |
|               | <b>Creatine phosphokinase</b> |                              |                              |                                 |                         |
|               | Grade 2                       | -                            | -                            | 1(4.4)                          | 1(1.4)                  |
|               | <b>Urine red cell</b>         | <b>1(4.2)</b>                | <b>1(4.2)</b>                | <b>1 (4.4)</b>                  | <b>3(4.2)</b>           |
|               | Grade 1                       | 1(4.2)                       | 1(4.2)                       |                                 | 2(2.8)                  |
|               | Grade 2                       | -                            | -                            | 1(4.4)                          | 1(4.3)                  |
|               | <b>Urine glucose</b>          | -                            | <b>1(4.2)</b>                | <b>1(4.4)-</b>                  | <b>2(2.8)</b>           |
|               | Grade 1                       | -                            | -                            | 1(4.4)                          | 1(4.3)                  |
|               | Grade 3                       | -                            | 1(4.2)                       | -                               | 1(4.3)                  |
| <b>First</b>  | <b>Laboratory index</b>       | <b>2(8.3)</b>                | <b>1(4.2)</b>                | -                               | <b>2(2.8)</b>           |
|               | Grade 1                       | 1(4.2)                       | -                            | -                               | 1(1.4)                  |
|               | Grade 2                       | 1(4.2)                       | -                            | -                               | 1(1.4)                  |
|               | Grade 3                       | -                            | 1(4.2)                       | -                               | 1(1.4)                  |
|               | <b>Total bilirubin</b>        |                              |                              |                                 |                         |
|               | Grade 2                       | 1(4.2)                       | -                            | -                               | 1(1.4)                  |
|               | <b>Urine red cell</b>         |                              |                              |                                 |                         |
|               | Grade 1                       | 1(4.2)                       | -                            | -                               | 1(1.4)                  |
|               | <b>Urine glucose</b>          |                              |                              |                                 |                         |
|               | Grade 3                       | -                            | 1(4.2)                       | -                               | 1(1.4)                  |
| <b>Second</b> | <b>Laboratory index</b>       | <b>1(4.2)</b>                | <b>1 (4.2)</b>               | <b>1 (4.4)</b>                  | <b>3(4.2)</b>           |
|               | Grade 1                       | 1(4.2)                       | -                            | 1 (4.4)                         | 2 (2.8)                 |
|               | Grade 2                       | -                            | 1 (4.2)                      | 1 (4.4)                         | 2 (2.8)                 |
|               | <b>Total bilirubin</b>        |                              |                              |                                 |                         |
|               | Grade 1                       | 1(4.2)                       | -                            | -                               | 1(1.4)                  |
|               | <b>Creatine phosphokinase</b> |                              |                              |                                 |                         |
|               | Grade 2                       | -                            | -                            | 1(4.4)                          | 1(1.4)                  |
|               | <b>Urine red cell</b>         |                              |                              |                                 |                         |
|               | Grade 2                       | -                            | 1 (4.2)                      | 1 (4.4)                         | 2(2.8)                  |
|               | <b>Urine glucose</b>          |                              |                              |                                 |                         |
|               | Grade 1                       | -                            | -                            | 1 (4.4)                         | 1(1.4)                  |

Data are n (%). ALT=alanine aminotransferase. AST=aspartate aminotransferase.

Generally, we would assume that the laboratory abnormalities occurred at day 3 were related to the vaccination because of the strong correlation in time.

## Appendix 5 Serum Inflammatory Factors

Table 5-1 Changes of Serum Inflammatory Factors on Day 7 after vaccination in the Cohort of Day 0,14 Schedule in the Phase 1 Clinical Trial.

| Inflammatory factors | Time& Characteristics     | First dose        |                   |                      |        | Second dose       |                   |                      |         |
|----------------------|---------------------------|-------------------|-------------------|----------------------|--------|-------------------|-------------------|----------------------|---------|
|                      |                           | 3 µg group (N=24) | 6 µg group (N=24) | Placebo group (N=24) | P†     | 3 µg group (N=24) | 6 µg group (N=24) | Placebo group (N=23) | P†      |
| IL-6                 | Before vaccination        |                   |                   |                      |        |                   |                   |                      |         |
|                      | Mean (SD)                 | 9.1(14.1)         | 10.0(13.4)        | 7.7(10.3)            | 0.2607 | 4.7(6.4)          | 10.0(12.6)        | 6.1(6.7)             | 0.0073  |
|                      | Median                    | 2.5               | 5.2               | 4.3                  |        | 1.7               | 5.4               | 3.5                  |         |
|                      | 7 days after first dose   |                   |                   |                      |        |                   |                   |                      |         |
|                      | Mean (SD)                 | 9.1(12.8)         | 9.2(13.0)         | 7.6(9.7)             | 0.7130 | 6.6(10.9)         | 11.2(14.4)        | 7.5(11.5)            | 0.0077  |
|                      | Median                    | 2.8               | 4.4               | 4.3                  |        | 2.1               | 5.8               | 3.0                  |         |
|                      | Difference (After-Before) |                   |                   |                      |        |                   |                   |                      |         |
|                      | Mean (SD)                 | 0.0(2.9)          | -0.8(2.6)         | -0.1(2.5)            | 0.4729 | 1.9(6.6)          | 1.2(2.9)          | 1.4(5.6)             | 0.3558  |
|                      | Median                    | 0.8               | -0.8              | 0.6                  |        | 0.6               | 0.3               | 0.0                  |         |
|                      | P *                       | 0.9500            | 0.1568            | 0.8762               |        | 0.1705            | 0.0611            | 0.2415               |         |
| IL-2                 | Before vaccination        |                   |                   |                      |        |                   |                   |                      |         |
|                      | Mean (SD)                 | 1.2(2.6)          | 0.6(0.8)          | 0.7(1.0)             | 0.5098 | 0.4(0.9)          | 1.6(2.0)          | 1.0 (1.2)            | <0.0001 |
|                      | Median                    | 0.145             | 0.277             | 0.201                |        | 0.166             | 0.731             | 0.477                |         |
|                      | 7 days after first dose   |                   |                   |                      |        |                   |                   |                      |         |
|                      | Mean (SD)                 | 1.3(1.6)          | 1.5(2.2)          | 1.2(1.6)             | 0.8533 | 1.0(2.014)        | 0.8(1.1)          | 0.5(0.8)             | 0.6126  |
|                      | Median                    | 0.478             | 0.595             | 0.591                |        | 0.145             | 0.224             | 0.189                |         |
|                      | Difference (After-Before) |                   |                   |                      |        |                   |                   |                      |         |
|                      | Mean (SD)                 | 0.1(1.8)          | 0.9(2.5)          | 0.5(1.6)             | 0.5501 | 0.6(1.6)          | -0.8(1.3)         | -0.5(0.8)            | <0.0001 |
|                      | Median                    | 0.3               | 0.2               | 0.4                  |        | 0.0               | -0.5              | -0.3                 |         |
|                      | P *                       | 0.7621            | 0.0949            | 0.1178               |        | 0.0662            | <b>0.0102</b>     | <b>0.0053</b>        |         |
| TNF-α                | Before vaccination        |                   |                   |                      |        |                   |                   |                      |         |
|                      | Mean (SD)                 | 19.7(33.5)        | 5.3(9.1)          | 9.2(12.2)            | 0.0145 | 14.5(17.3)        | 5.2(8.1)          | 11.8(12.9)           | 0.0017  |
|                      | Median                    | 6.7               | 1.3               | 6.1                  |        | 8.9               | 2.3               | 8.7                  |         |
|                      | 7 days after first dose   |                   |                   |                      |        |                   |                   |                      |         |
|                      | Mean (SD)                 | 17.7(26.7)        | 12.2(15.6)        | 14.3(13.2)           | 0.5115 | 22.5(27.294)      | 7.1(9.654)        | 15.1(16.6)           | 0.0004  |
|                      | Median                    | 10.0              | 7.9               | 8.2                  |        | 14.4              | 3.8               | 12.4                 |         |
|                      | Difference (After-Before) |                   |                   |                      |        |                   |                   |                      |         |
|                      | Mean (SD)                 | -1.9(11.8)        | 6.9(8.4)          | 5.1(5.6)             | 0.0041 | 8.0(22.4)         | 1.8(3.0)          | 3.3(8.2)             | 0.1374  |
|                      | Median                    | 1.0               | 6.2               | 4.4                  |        | 4.1               | 1.7               | 3.1                  |         |
|                      | P *                       | 0.4351            | 0.0006            | 0.0002               |        | 0.0917            | <b>0.0060</b>     | 0.0623               |         |

\* Paired t test. †P value of the comparison among three groups.

**Table 5-2 Changes of Serum Inflammatory Factors on Day 7 after Vaccination in the Cohort of Day 0,28 Schedule.**

| Inflammatory factors      | Time& Characteristics     | First dose        |                   |                      |            | Second dose       |                   |                      |        |
|---------------------------|---------------------------|-------------------|-------------------|----------------------|------------|-------------------|-------------------|----------------------|--------|
|                           |                           | 3 µg group (N=24) | 6 µg group (N=24) | Placebo group (N=24) | P†         | 3 µg group (N=24) | 6 µg group (N=24) | Placebo group (N=23) | P†     |
| IL-6                      | Before vaccination        |                   |                   |                      |            |                   |                   |                      |        |
|                           | Mean (SD)                 | 6.1 (9.8)         | 7.9 (7.7)         | 8.8(14.8)            | 0.0610     | 12.2 (33.6)       | 5.8 (7.9)         | 6.4 (11.2)           | 0.3873 |
|                           | Median                    | 2.9               | 5.2               | 2.7                  |            | 3.4               | 2.7               | 12.0                 |        |
|                           | 7 days after first dose   |                   |                   |                      |            |                   |                   |                      |        |
|                           | Mean (SD)                 | 6.4 (11.2)        | 7.9 (8.2)         | 8.8 (14.0)           | 0.0362     | 6.8 (10.9)        | 5.1 (8.0)         | 6.6 (11.5)           | 0.4455 |
|                           | Median                    | 3.0               | 5.0               | 3.1                  |            | 3.3               | 2.7               | 1.8                  |        |
|                           | Difference (After-Before) |                   |                   |                      |            |                   |                   |                      |        |
|                           | Mean (SD)                 | 0.3 (2.3)         | -0.1 (1.8)        | -0.1 (1.6)           | 0.9620     | -5.4 (26.2)       | -0.7 (2.1)        | 0.2 (2.5)            | 0.9155 |
|                           | Median                    | 0.0               | -0.1              | -0.2                 |            | -0.3              | -0.4              | -0.3                 |        |
| P *                       | 0.4955                    | 0.8151            | 0.8130            |                      | 0.3189     | 0.1448            | 0.7644            |                      |        |
| IL-2                      | Before vaccination        |                   |                   |                      |            |                   |                   |                      |        |
|                           | Mean (SD)                 | 0.8(1.8)          | 1.0(1.3)          | 1.2 (2.8)            | 0.0061     | 0.9 (1.4)         | 1.4 (2.3)         | 1.0 (1.9)            | 0.7493 |
|                           | Median                    | 0.1               | 0.6               | 0.3                  |            | 0.427             | 0.413             | 0.430                |        |
|                           | 7 days after first dose   |                   |                   |                      |            |                   |                   |                      |        |
|                           | Mean (SD)                 | 0.7 (1.5)         | 0.9 (1.2)         | 1.2 (2.2)            | 0.0197     | 0.9 (1.8)         | 0.4 (0.9)         | 0.9 (2.1)            | 0.0093 |
|                           | Median                    | 0.2               | 0.5               | 0.3                  |            | 0.331             | 0.118             | 0.183                |        |
|                           | Difference (After-Before) |                   |                   |                      |            |                   |                   |                      |        |
|                           | Mean (SD)                 | -0.1 (0.8)        | -0.1 (0.3)        | -0.145 (0.925)       | 0.4280     | 0.1 (0.7)         | -1.0 (2.6)        | -0.1 (2.6)           | 0.0233 |
|                           | Median                    | 0.1               | 0.0               | 0.1                  |            | -0.1              | -0.2              | -0.1                 |        |
| P *                       | 0.6294                    | 0.1779            | 0.4597            |                      | 0.6010     | 0.0603            | 0.8761            |                      |        |
| TNF-α                     | Before vaccination        |                   |                   |                      |            |                   |                   |                      |        |
|                           | Mean (SD)                 | 5.3 (9.1)         | 8.3 (9.6)         | 7.8 (13.9)           | 0.0535     | 8.2 (13.3)        | 10.1 (8.9)        | 10.3 (18.3)          | 0.0797 |
|                           | Median                    | 2.2               | 4.2               | 0.7                  |            | 3.806             | 8.248             | 4.422                |        |
|                           | 7 days after first dose   |                   |                   |                      |            |                   |                   |                      |        |
|                           | Mean (SD)                 | 6.2 (7.9)         | 8.5 (8.7)         | 7.3 (14.0)           | 0.2779     | 7.6 (9.6)         | 4.6 (7.9)         | 6.9 (10.7)           | 0.2420 |
|                           | Median                    | 4.0               | 5.9               | 2.1                  |            | 4.559             | 3.221             | 3.144                |        |
| Difference (After-Before) |                           |                   |                   |                      |            |                   |                   |                      |        |
| Mean (SD)                 | 0.9 (8.3)                 | 0.2 (5.7)         | -0.6 (6.8)        | 0.2864               | -0.6 (8.1) | -5.5 (5.3)        | -3.4 (11.4)       | 0.0296               |        |

| Inflammatory factors | Time & Characteristics | First dose        |                   |                      | P† | Second dose       |                   |                      | P† |
|----------------------|------------------------|-------------------|-------------------|----------------------|----|-------------------|-------------------|----------------------|----|
|                      |                        | 3 µg group (N=24) | 6 µg group (N=24) | Placebo group (N=24) |    | 3 µg group (N=24) | 6 µg group (N=24) | Placebo group (N=23) |    |
|                      | Median                 | 2.3               | -0.1              | 0.4                  |    | -0.5              | -4.7              | -3.2                 |    |
|                      | <i>P</i> *             | 0.5117            | 0.1646            | 0.4009               |    | 0.6988            | <0.0001           | 0.1662               |    |

\* Paired t test. †P value of the comparison among three groups.

## Appendix 6 Supplementary Data of Different Categories of Antibodies

**Table 6-1 GMTs of neutralizing antibodies to live SARS-CoV-2 and RBD-specific IgG Induced by Two doses of CoronaVac Administrated at Day 0,14 and Day 0,28 schedule in the phase 1& 2 Clinical Trial.**

| Phase   | Schedule, Antibody categories | Time*                    | 3 µg group                | 6 µg group                | Placebo group             | P value <sup>1</sup> | P value <sup>2</sup> |        |
|---------|-------------------------------|--------------------------|---------------------------|---------------------------|---------------------------|----------------------|----------------------|--------|
| Phase 1 | Day 0,14 schedule             | Neutralizing antibodies¶ | Baseline                  | 2·0<br>(2·0,2·0)          | 2·1<br>(1·9,2·2)          | 2·0<br>(2·0,2·0)     | 0·3731               | 0·3225 |
|         |                               |                          | 14 days                   | 5·6<br>(3·6,8·7)          | 7·7<br>(5·2,11·5)         | 2·0<br>(2·0,2·0)     | <0·0001              | 0·2744 |
|         |                               |                          | 28 days                   | 5·4<br>(3·6,8·1)          | 15·2<br>(11·2,20·7)       | 2·0<br>(2·0,2·0)     | <0·0001              | 0·0001 |
|         |                               | RBD-IgG                  | Baseline                  | 80·0<br>(80·0,80·0)       | 80·0<br>(80·0,80·0)       | 80·0<br>(80·0,80·0)  | -                    | -      |
|         |                               |                          | 14 days                   | 465·8<br>(277·6,781·7)    | 987·0<br>(647·8,1504·0)   | 84·8<br>(78·0,92·1)  | <0·0001              | 0·0244 |
|         |                               |                          | 28 days                   | 465·8<br>(288·1,753·1)    | 1395·9<br>(955·2,2039·7)  | 89·8<br>(76·1,105·9) | <0·0001              | 0·0006 |
|         | Day 0,28 schedule             | Neutralizing antibodies¶ | Baseline                  | 2·0<br>(2·0,2·0)          | 2·0<br>(2·0,2·0)          | 2·0<br>(2·0,2·0)     | -                    | -      |
|         |                               |                          | 14 days                   | 16·0<br>(10·4,24·7)       | 25·9<br>(14·6,46·1)       | 2·0<br>(2·0,2·0)     | <0·0001              | 0·1736 |
|         |                               |                          | 28 days                   | 19·0<br>(13·2,27·4)       | 29·6<br>(17·9,48·9)       | 2·2<br>(1·8,2·8)     | <0·0001              | 0·1467 |
|         |                               | RBD-IgG                  | Baseline                  | 82·3<br>(77·6,87·4)       | 82·3<br>(77·6,87·4)       | 80·0<br>(80·0,80·0)  | 0·6216               | 1·0000 |
|         |                               |                          | 14 days                   | 1356·1<br>(881·4,2086·4)  | 2152·7<br>(1446·1,3204·6) | 80·0<br>(80·0,80·0)  | <0·0001              | 0·1099 |
|         |                               |                          | 28 days                   | 1045·7<br>(721·6,1515·5)  | 1917·9<br>(1344·8,2735·2) | 80·0<br>(80·0,80·0)  | <0·0001              | 0·0184 |
| Phase 2 | Day 0,14 schedule             | Neutralizing antibodies¶ | Baseline                  | 2·0<br>(2·0,2·0)          | 2·0<br>(2·0,2·0)          | 2·0<br>(2·0,2·0)     | -                    | -      |
|         |                               |                          | 14 days                   | 27·6<br>(22·7,33·5)       | 34·5<br>(28·5,41·8)       | 2·3<br>(2·0,2·5)     | <0·0001              | 0·1051 |
|         |                               |                          | 28 days                   | 23·8<br>(20·5,27·7)       | 30·1<br>(26·1,34·7)       | 2·0<br>(2·0,2·0)     | <0·0001              | 0·0267 |
|         |                               | RBD-IgG                  | Baseline                  | 81·5<br>(79·8,83·2)       | 81·4<br>(79·8,83·1)       | 81·0<br>(79·0,83·0)  | 0·9423               | 0·9746 |
|         |                               |                          | 14 days                   | 1094·3<br>(936·7,1278·4)  | 1365·4<br>(1160·4,1606·7) | 81·0<br>(79·0,83·0)  | <0·0001              | 0·0528 |
|         |                               |                          | 28 days                   | 1053·7<br>(911·7,1217·7)  | 1318·2<br>(1156·9,1501·9) | 80·0<br>(80·0,80·0)  | <0·0001              | 0·0235 |
|         | Day 0,28 schedule             | Neutralizing antibodies¶ | Baseline                  | 2·0<br>(2·0,2·0)          | 2·0<br>(2·0,2·0)          | 2·0<br>(2·0,2·0)     | -                    | -      |
|         |                               |                          | 28 days                   | 44·1<br>(37,2,52·2)       | 65·4<br>(56·4,75·9)       | 2·0<br>(2·0,2·1)     | <0·0001              | 0·0006 |
|         |                               |                          | RBD-IgG                   | Baseline                  | 81·0<br>(79·6,82·3)       | 80·5<br>(79·5,81·4)  | 81·0<br>(79·1,82·9)  | 0·8297 |
|         |                               | 28 days                  | 1783·6<br>(1519·3,2093·8) | 2287·5<br>(2038·2,2567·3) | 87·9<br>(79·7,96·9)       | <0·0001              | 0·0133               |        |

\*Days post the dose 2.

P value<sup>1</sup> indicate the P value of comparison among three groups;

P value<sup>2</sup> indicate the P value of comparison between 3µg and 6µg group

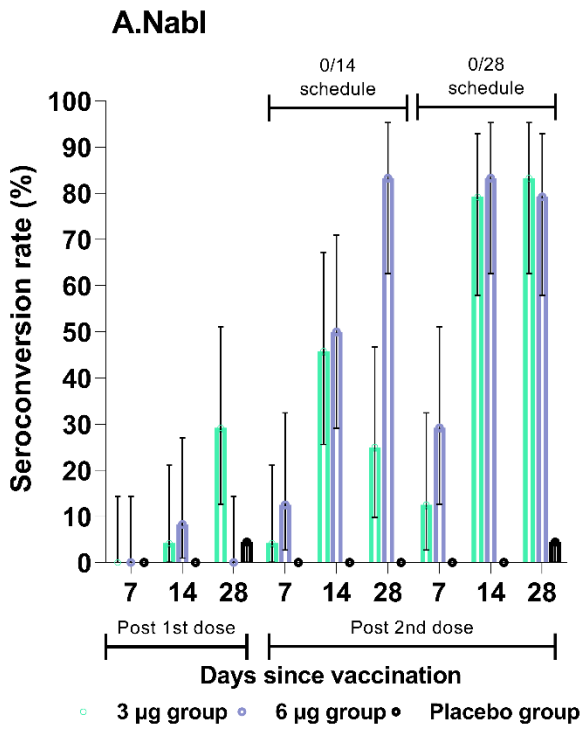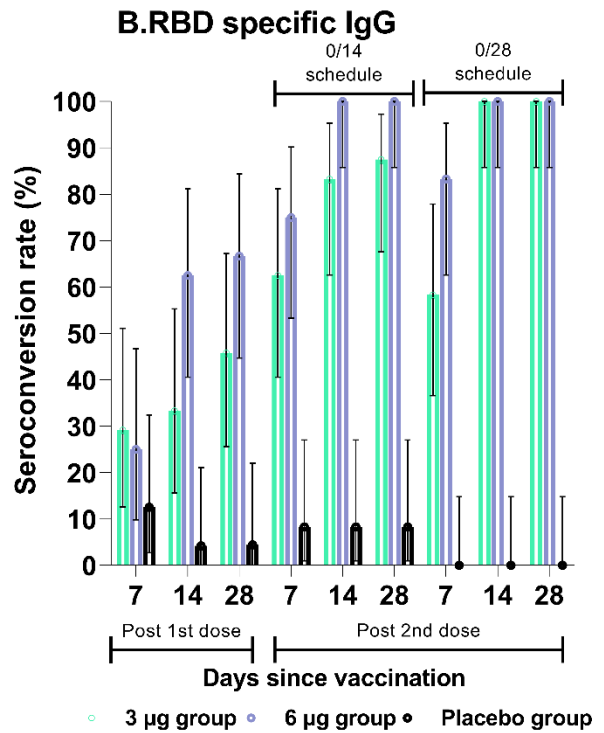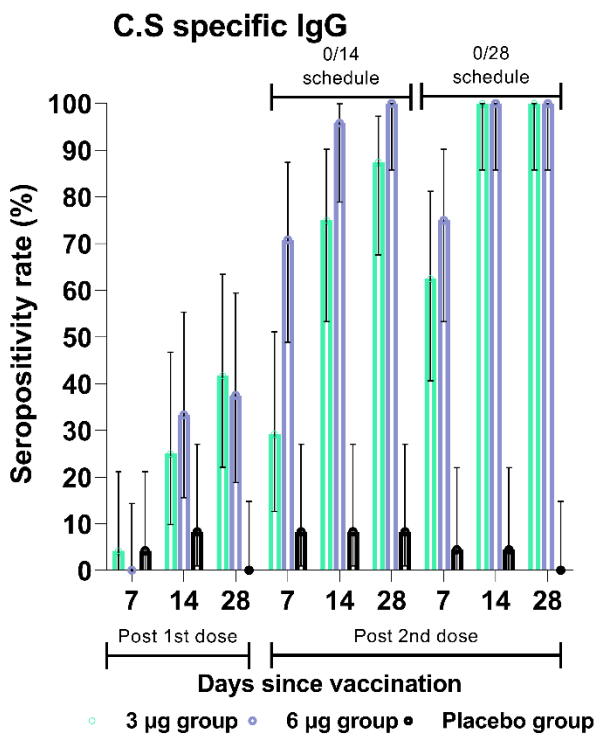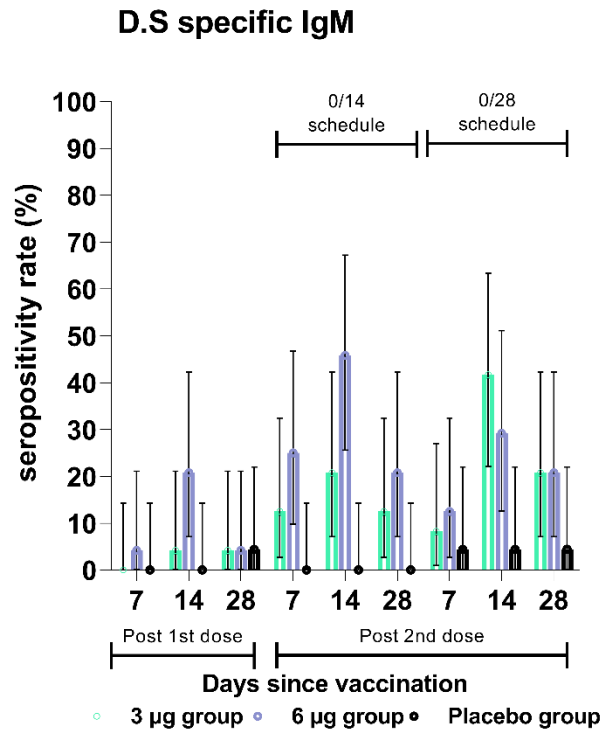

**Figure 6-1 Seroconversion Rates (95%CI) of neutralizing antibodies, IgG and IgM against SARS-CoV-2 after Two Doses of CoronaVac Adminstrated Following Two Different Schedule in the Phase I Clinical Trial**



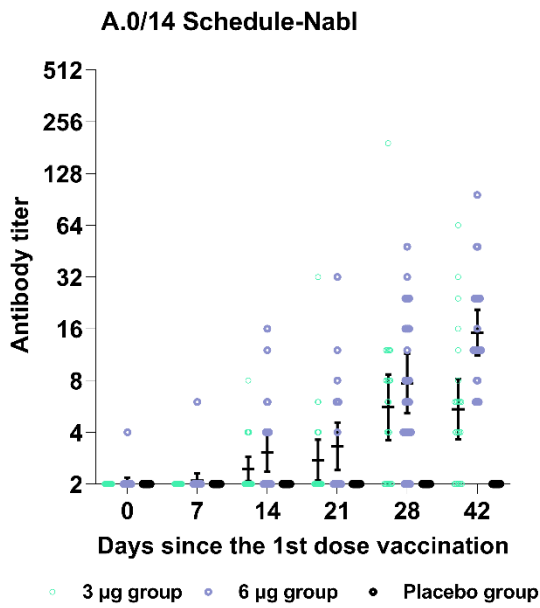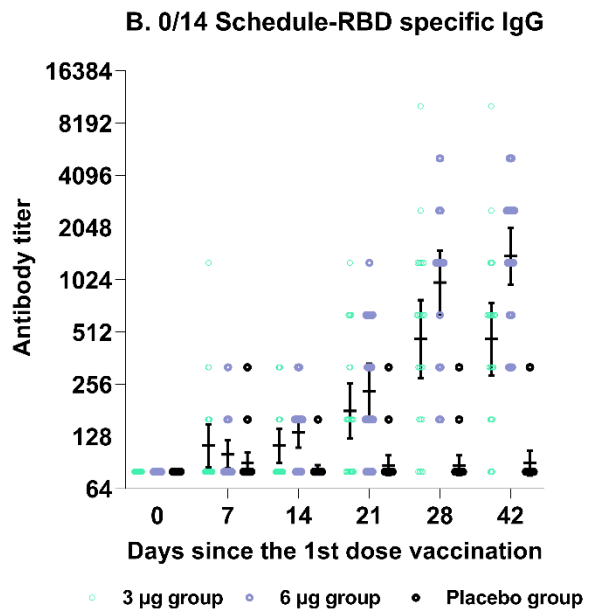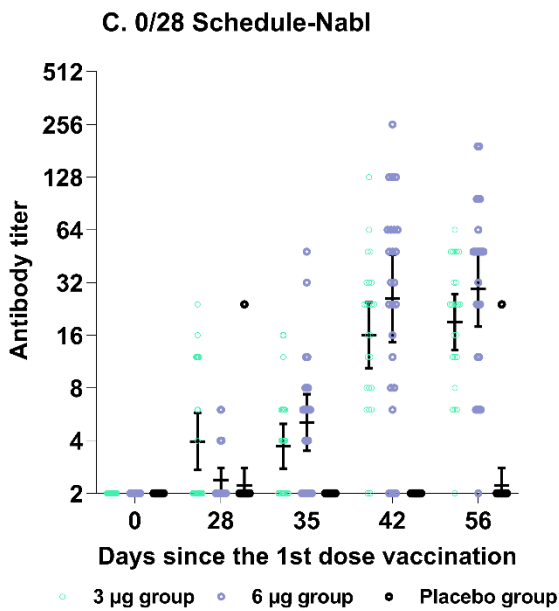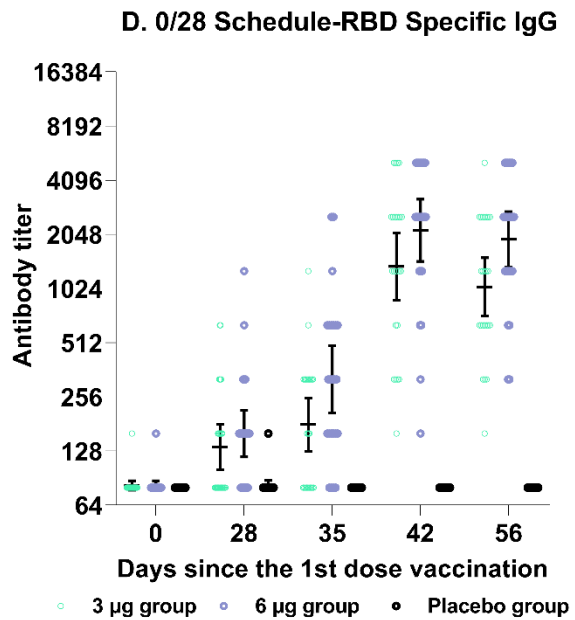

**Figure 6-2 GMT (95%CI) of the neutralizing antibodies and RBD Specific IgG after Two Doses of CoronaVac Administrated Following Two Different Schedule in the Phase I Clinical Trial.**

**Table 6-2 Kinetic of Different Categories of Antibody Induced by Two Doses of CoronaVac Administrated at Day 0,14 or Day 0,28 Schedule in the Phase 1 Clinical Trial.**

| Antibody Categories      | Group    | Indicators                   | Day 0, 14 Schedule           |                              |                        |                         |                         | Day 0,28 Schedule       |                           |                         |                           |                           |                           |
|--------------------------|----------|------------------------------|------------------------------|------------------------------|------------------------|-------------------------|-------------------------|-------------------------|---------------------------|-------------------------|---------------------------|---------------------------|---------------------------|
|                          |          |                              | Post dose 1                  |                              | Post dose 2            |                         |                         | Post dose 1             | Post dose 2               |                         |                           |                           |                           |
|                          |          |                              | Day7                         | Day14                        | Day 7                  | Day 14                  | Day 28                  | Day 28                  | Day 7                     | Day 14                  | Day 28                    |                           |                           |
| Neutralizing antibodies¶ | 3µg      | Seroconversion n (%) (95%CI) | 0(0·0)<br>(0·0,14·3)         | 1(4·2)<br>(0·1,21·1)         | 1(4·2)<br>(0·1,21·1)   | 11(45·8)<br>(25·6,67·2) | 6(25·0)<br>(9·8,46·7)   | 7(29·2)<br>(12·6,51·1)  | 3(12·5)<br>(2·7,32·4)     | 19(79·2)<br>(57·9,92·9) | 20(83·3)<br>(62·6,95·3)   |                           |                           |
|                          |          | GMT (95%CI)                  | 2·0<br>(2·0,2·0)             | 2·4<br>(2·1,2·9)             | 2·8<br>(2·1,3·6)       | 5·6<br>(3·6,8·7)        | 5·4<br>(3·6,8·1)        | 4·0<br>(2·7,5·8)        | 3·7<br>(2·8,5·0)          | 16·0<br>(10·4,24·7)     | 19·0<br>(13·2,27·4)       |                           |                           |
|                          |          | 6µg                          | Seroconversion n (%) (95%CI) | 0(0·0)<br>(0·0,14·3)         | 2(8·3)<br>(1·0,27·0)   | 3(12·5)<br>(2·7,32·4)   | 12(50·0)<br>(29·1,70·9) | 20(83·3)<br>(62·6,95·3) | 0(0·0)<br>(0,14·3)        | 7(29·2)<br>(12·6,51·1)  | 20(83·3)<br>(62·6,95·3)   | 19(79·2)<br>(57·9,92·9)   |                           |
|                          |          |                              | GMT (95%CI)                  | 2·1<br>(1·9,2·3)             | 3·1<br>(2·4,4·0)       | 3·3<br>(2·4,4·6)        | 7·7<br>(5·2,11·5)       | 15·2<br>(11·2,20·7)     | 2·4<br>(2·0,2·8)          | 5·1<br>(3·5,7·4)        | 25·9<br>(14·6,46·1)       | 29·6<br>(17·9,48·9)       |                           |
|                          |          |                              | Placebo                      | Seroconversion n (%) (95%CI) | 0(0·0)<br>(0·0,14·3)   | 0(0·0)<br>(0·0,14·3)    | 0(0·0)<br>(0,14·3)      | 0(0·0)<br>(0,14·3)      | 0(0·0)<br>(0,14·3)        | 1(4·4)<br>(0·1,22·0)    | 0(0·0)<br>(0,14·8)        | 0(0·0)<br>(0,14·8)        | 1(4·4)<br>(0·1,22·0)      |
|                          |          | GMT (95%CI)                  |                              | 2·0<br>(2·0, 2·0)            | 2·0<br>(2·0, 2·0)      | 2·0<br>(2·0, 2·0)       | 2·0<br>(2·0,2·0)        | 2·0<br>(2·0,2·0)        | 2·2<br>(1·8,2·8)          | 2·0<br>(2·0,2·0)        | 2·0<br>(2·0,2·0)          | 2·2<br>(1·8,2·8)          |                           |
|                          | P value* | 1·000                        |                              | 0·7682                       | 0·3143                 | 0·0002                  | <0·0001                 | 0·0028                  | 0·0128                    | <0·0001                 | <0·0001                   |                           |                           |
|                          | P value† | 0·3731                       | <b>0·0029</b>                | 0·0114                       | <0·0001                | <0·0001                 | 0·0045                  | <0·0001                 | <0·0001                   | <0·0001                 |                           |                           |                           |
|                          | IgG-RBD  | 3µg                          | Seroconversion n (%) (95%CI) | 7(29·2)<br>(12·6,51·1)       | 8(33·3)<br>(15·6,55·3) | 15(62·5)<br>(40·6,81·2) | 20(83·3)<br>(62·6,95·3) | 21(87·5)<br>(67·6,97·3) | 11(45·8)<br>(25·6,67·2)   | 14(58·3)<br>(36·6,77·9) | 24(100)<br>(85·8,100)     | 24(100)<br>(85·8,100)     |                           |
|                          |          |                              | GMT (95%CI)                  | 113·1<br>(85·0,150·6)        | 113·1<br>(90·0,142·2)  | 179·6<br>(125·0,258·1)  | 465·8<br>(277·6,781·7)  | 465·8<br>(288·1,753·1)  | 134·5<br>(100·7,179·7)    | 179·6<br>(127·6,252·7)  | 1356·1<br>(881·4,2086·4)  | 1045·7<br>(721·6,1515·5)  |                           |
|                          |          |                              | 6µg                          | Seroconversion n (%) (95%CI) | 6(25·0)<br>(9·8,46·7)  | 15(62·5)<br>(40·6,81·2) | 18(75·0)<br>(53·3,90·2) | 24(100)<br>(85·8,100)   | 24(100)<br>(85·8,100)     | 16(66·7)<br>(44·7,84·4) | 20(83·3)<br>(62·6,95·3)   | 24(100)<br>(85·8,100)     | 24(100)<br>(85·8,100)     |
|                          |          |                              |                              | GMT (95%CI)                  | 100·8<br>(83·6,121·5)  | 134·5<br>(110·4,164·0)  | 232·9<br>(161·5,335·8)  | 987·0<br>(647·8,1504·0) | 1395·9<br>(955·2,2039·7)  | 160·0<br>(118·7,215·8)  | 320·0<br>(207·84,492·7)   | 2152·7<br>(1446·1,3204·6) | 1917·9<br>(1344·8,2735·2) |
| Placebo                  |          |                              |                              | Seroconversion n (%) (95%CI) | 3(12·5)<br>(2·7,32·4)  | 1(4·2)<br>(0·1,21·1)    | 2(8·3)<br>(1·0,27·0)    | 2(8·3)<br>(1·0,27·0)    | 2(8·3)<br>(1·0,27·0)      | 1(4·4)<br>(0·1,22·0)    | 0(0·0)<br>(0,14·8)        | 0(0·0)<br>(0,14·8)        | 0(0·0)<br>(0,14·8)        |
|                          |          |                              | GMT (95%CI)                  | 89·80<br>(78·0,103·4)        | 82·3<br>(77·6,87·4)    | 87·2<br>(76·5,99·5)     | 84·8<br>(78·0,92·1)     | 89·8<br>(76·1,105·9)    | 82·5<br>(77·5,87·8)       | 80·0<br>(80·0,80·0)     | 80·0<br>(80·0,80·0)       | 80·0<br>(80·0,80·0)       |                           |
|                          |          | P value*                     | 0·3518                       | 0·0001                       | <0·0001                | <0·0001                 | <0·0001                 | 0·0001                  | <0·0001                   | <0·0001                 | <0·0001                   |                           |                           |
| P value†                 |          | 0·2916                       | 0·0005                       | <0·0001                      | <0·0001                | <0·0001                 | 0·0006                  | <0·0001                 | <0·0001                   | <0·0001                 |                           |                           |                           |
| IgG-S                    |          | 3µg                          | Seropositivity n (%) (95%CI) | 1(4·2)<br>(0·1,21·1)         | 6(25·0)<br>(9·8,46·7)  | 7(29·2)<br>(12·6,51·1)  | 18(75·0)<br>(53·3,90·2) | 21(87·5)<br>(53·3,90·2) | 10(41·7)<br>(22·1,63·4)   | 15(62·5)<br>(40·6,81·2) | 24(100·0)<br>(85·8,100·0) | 24(100·0)<br>(85·8,100·0) |                           |
|                          |          |                              | 6µg                          | Seropositivity n (%) (95%CI) | 0(0·0)<br>(0,14·3)     | 8(33·3)<br>(15·6,55·3)  | 17(70·8)<br>(48·9,87·4) | 23(95·8)<br>(78·9,99·9) | 24(100·0)<br>(85·8,100·0) | 9(37·5)<br>(18·8,59·4)  | 18(75·0)<br>(53·3,90·2)   | 24(100·0)<br>(85·8,100·0) | 24(100·0)<br>(85·8,100·0) |
|                          |          | Placebo                      |                              | Seropositivity               | 1(4·2)                 | 2(8·3)                  | 2(8·3)                  | 2(8·3)                  | 2(8·3)                    | 0(0·0)                  | 1(4·4)                    | 1(4·4)                    | 0(0·0)                    |

| Antibody Categories | Group   | Indicators     | Day 0, 14 Schedule |            |             |             |            | Day 0,28 Schedule |             |             |            |  |
|---------------------|---------|----------------|--------------------|------------|-------------|-------------|------------|-------------------|-------------|-------------|------------|--|
|                     |         |                | Post dose 1        |            | Post dose 2 |             |            | Post dose 1       | Post dose 2 |             |            |  |
|                     |         |                | Day7               | Day14      | Day 7       | Day 14      | Day 28     | Day 28            | Day 7       | Day 14      | Day 28     |  |
|                     |         | n (%) (95%CI)  | (0·1,21·1)         | (1·0,27·0) | (1·0,27·0)  | (1·0,27·0)  | (1·0,27·0) | (0,14·8)          | (0·1,22·0)  | (0·1,22·0)  | (0,14·8)   |  |
|                     |         | P value*       | 1·000              | 0·1054     | <0·0001     | <0·0001     | <0·0001    | 0·0019            | <0·0001     | <0·0001     | <0·0001    |  |
| IgM                 | 3µg     | Seropositivity | 0(0·0)             | 1(4·2)     | 3(12·5)     | 5(20·8)     | 3(12·5)    | 1(4·2)            | 2(8·3)      | 10(41·7)    | 5(20·8)    |  |
|                     |         | n (%) (95%CI)  | (0,14·3)           | (0·1,21·1) | (2·7,32·4)  | (7·1,42·2)  | (2·7,32·4) | (0·1,21·1)        | (1·0,27·0)  | (22·1,63·4) | (7·1,42·2) |  |
|                     | 6µg     | Seropositivity | 1(4·2)             | 5(20·8)    | 6(25·0)     | 11(45·8)    | 5(20·8)    | 1(4·2)            | 3(12·5)     | 7(29·2)     | 5(20·8)    |  |
|                     |         | n (%) (95%CI)  | (0·1,21·1)         | (7·1,42·2) | (9·8,46·7)  | (25·6,67·2) | (7·1,42·2) | (0·1,21·1)        | (2·7,32·4)  | (12·6,51·1) | (7·1,42·2) |  |
|                     | Placebo | Seropositivity | 0(0·0)             | 0(0·0)     | 0(0·0)      | 0(0·0)      | 0(0·0)     | 1(4·4)            | 1(4·4)      | 1(4·4)      | 1(4·4)     |  |
|                     |         | n (%) (95%CI)  | (0,14·3)           | (0,14·3)   | (0·14·3)    | (0,14·3)    | (0,14·3)   | (0·1,22·0)        | (0·1,22·0)  | (0·1,22·0)  | (0·1,22·0) |  |
|                     |         | P value*       | 1·000              | 0·0418     | 0·0343      | 0·0007      | 0·0855     | 1·000             | 0·8654      | 0·0116      | 0·2036     |  |

\*P value of the comparison of seroconversion/seropositivity rates among three groups; † P value of the comparison of GMTs among the three groups

**Table 6-3 Neutralizing Antibody to Pseudovirus Induced by Two Doses of CoronaVac Administrated at the Day 0,14 Schedule in the Phase 1 and 2 Clinical Trial.**

| Group   | Indicators              | Phase 1                   |                  |                           |                  | Phase 2                    |
|---------|-------------------------|---------------------------|------------------|---------------------------|------------------|----------------------------|
|         |                         | Post 1 <sup>st</sup> dose |                  | Post 2 <sup>nd</sup> dose |                  | After 2 <sup>nd</sup> dose |
|         |                         | Day 7                     | Day 14           | Day 7                     | Day 14           | Day 14                     |
| 3µg     | Seroconversion          | 2(8·3)                    | 7(29·2)          | 3(12·5)                   | 10(41·7)         | 94(79·7)                   |
|         | n (%) (95%CI)           | (1·0,27·0)                | (12·6,51·1)      | (2·7,32·4)                | (22·1,63·4)      | (71·3,86·5)                |
|         | GMT (95%CI)             | 15·2 (12·0,19·2)          | 15·8 (11·3,22·1) | 11·2 (7·7,16·3)           | 22·4 (13·6,36·9) | 84·9 (72·9,98·7)           |
| 6µg     | Seroconversion          | 1(4·2)                    | 5(20·8)          | 7(29·2)                   | 18(75·0)         | 103(86·6)                  |
|         | n (%) (95%CI)           | (0·1,21·1)                | (7·1,42·2)       | (12·6,51·1)               | (53·3,90·2)      | (79·1,92·1)                |
|         | GMT (95%CI)             | 5·6 (4·4,7·1)             | 15·1 (8·9,25·5)  | 20·2 (12·7,32·0)          | 45·4 (27·0,76·4) | 95·6 (82·4,110·9)          |
| Placebo | Seroconversion          | 2(8·3)                    | 0(0·0)           | 0(0·0)                    | 0(0·0)           | 3(5·0)                     |
|         | n (%) (95%CI)           | (1·0,27·0)                | (0,14·3)         | (0,14·3)                  | (0,14·3)         | (1·0,13·9)                 |
|         | GMT (95%CI)             | 9·2 (6·7,12·7)            | 5·8 (4·9,7·0)    | 5·7 (4·9,6·5)             | 6·0 (5·0,7·1)    | 14·8 (12·6,17·5)           |
|         | P value*(three groups)  | 1·000                     | 0·0137           | 0·0128                    | <0·0001          | <0·0001                    |
|         | P value*, 3µg vs 6µg    | 1·000                     | 0·5050           | 0·1551                    | 0·0192           | 0·1566                     |
|         | P value† (three groups) | <0·0001                   | 0·0002           | <0·0001                   | <0·0001          | <0·0001                    |
|         | P value†, 3µg vs 6µg    | <0·0001                   | 0·8685           | 0·0465                    | 0·0483           | 0·2671                     |

\*P value of the comparison of the seroconversion rates; † P value of the comparison of the GMTs.

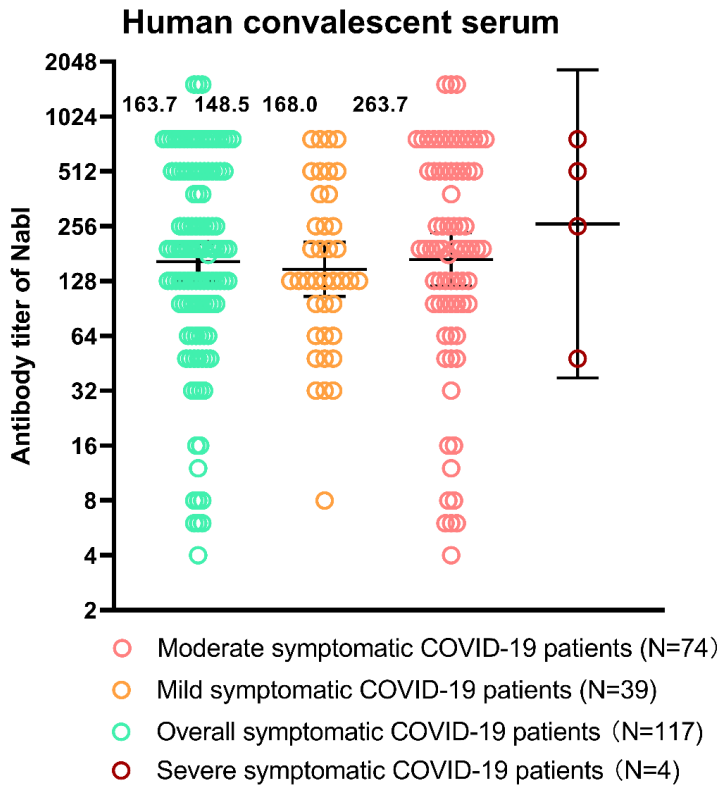

**Figure 6-3** Neutralizing antibody to live SARS-CoV-2 (Nabl) in serum of symptomatic COVID-19 patients.

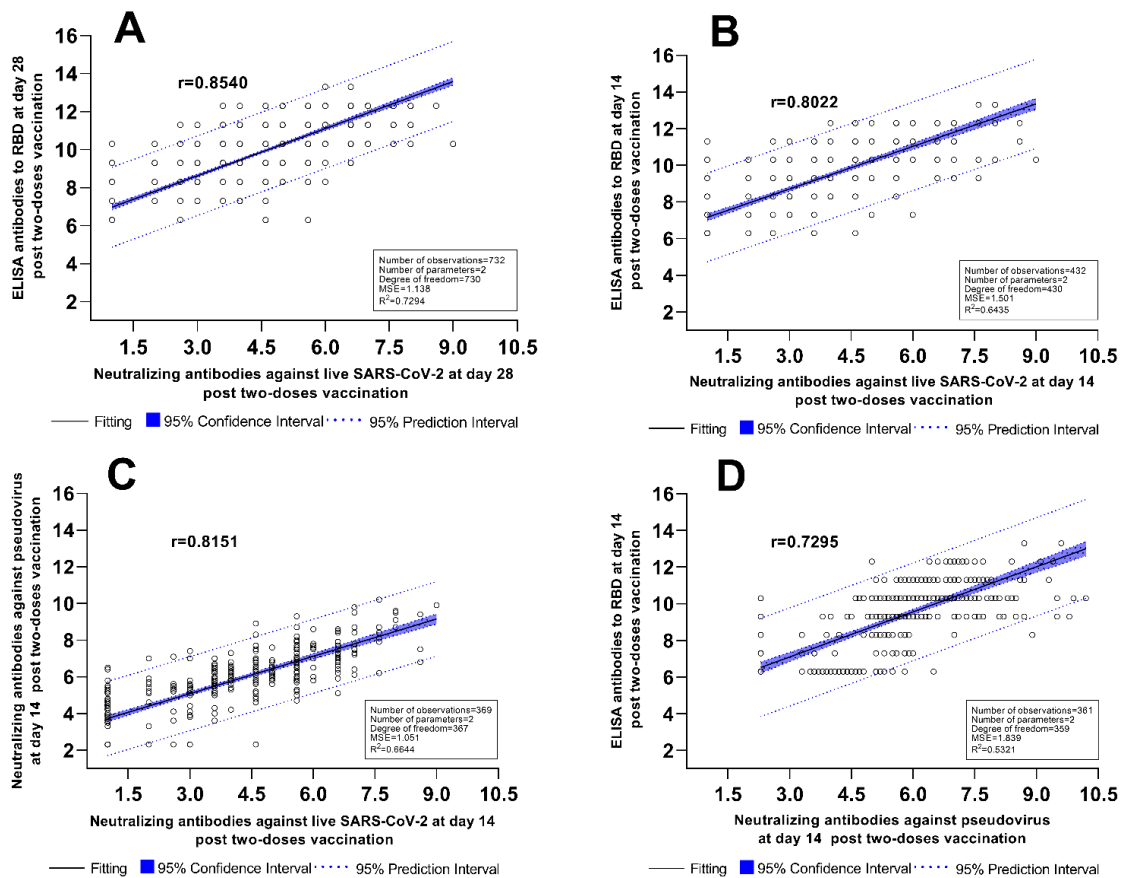

**Figure 6-4** The Association between Different Categories of Antibodies.

Note: the correlation analysis was conducted after  $\log_2$  transformation of the raw data, based on the pooled data of phase 1

and 2 trial (with two vaccination schedule cohorts pooled).

### Appendix 7 T Cell Response

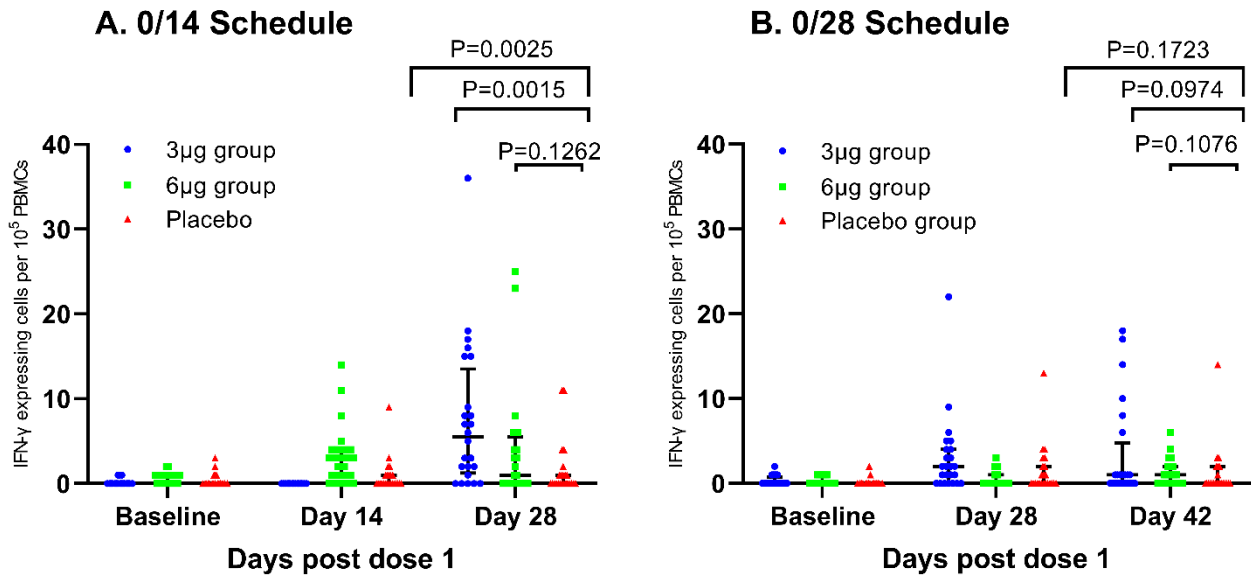

Figure 7-1 The T Cell Response (IFN- $\gamma$  detection) in the Phase 1 Clinical Trial.

**Table 7-1 The T Cell Responses (IFN- $\gamma$  detection) for of 0/14 Schedule in the Phase 1 Clinical Trial**

| Time                | Indicators                               | 3 $\mu$ g group<br>(N=24) | 6 $\mu$ g group<br>(N=24) | Placebo group<br>(N=24) | Total<br>(N=72) | P (Three groups) | P (3 $\mu$ g vs 6 $\mu$ g) |
|---------------------|------------------------------------------|---------------------------|---------------------------|-------------------------|-----------------|------------------|----------------------------|
| Baseline            | <b>Mean number of spot-forming units</b> |                           |                           |                         |                 |                  |                            |
|                     | Mean (SD)                                | 0.2 (0.3)                 | 0.6 (0.6)                 | 0.3 (0.8)               | 0.4 (0.6)       | 0.0052           | 0.0039                     |
|                     | 95%CI                                    | 0.0, 0.3                  | 0.4, 0.9                  | 0.0, 0.7                | -0.2, 1.0       |                  |                            |
|                     | Median                                   | 0.0                       | 0.7                       | 0.3                     | 0.0             |                  |                            |
|                     | Min, Max                                 | 0.0, 1.3                  | 0.0, 2.3                  | 0.0, 3.3                | 0.0, 3.3        |                  |                            |
|                     | <b>Proportion of positive responders</b> |                           |                           |                         |                 |                  |                            |
| 14 days post dose 1 | N (%)                                    | 0(0.0)                    | 0(0.0)                    | 0(0.0)                  | 0(0.0)          | 1.0000           | 1.0000                     |
|                     | 95%CI                                    | 0.0, 14.3                 | 0.0, 14.3                 | 0.0, 14.3               | 0.0, 5.0        |                  |                            |
|                     |                                          |                           |                           |                         |                 |                  |                            |
| 14 days post dose 2 | <b>Mean number of spot-forming units</b> |                           |                           |                         |                 |                  |                            |
|                     | Mean (SD)                                | 7.4 (8.5)                 | 3.9 (6.7)                 | 1.5 (3.1)               | 4.3 (6.8)       | 0.0025           | 0.0461                     |
|                     | 95%CI                                    | 3.9,11.1                  | 1.0, 6.7                  | 0.2,2.9                 | -3.2, 11.8      |                  |                            |
|                     | Median                                   | 5.5                       | 1.0                       | 0.0                     | 1.3             |                  |                            |
|                     | Min, Max                                 | 0.0, 35.7                 | 0.0, 25.0                 | 0.0, 11.0               | 0.0, 35.7       |                  |                            |
|                     | <b>Proportion of positive responders</b> |                           |                           |                         |                 |                  |                            |
| 14 days post dose 1 | N (%)                                    | 11 (45.8)                 | 5 (20.8)                  | 2 (8.3)                 | 18 (25.0)       | 0.0094           | 0.0662                     |
|                     | 95%CI                                    | 25.6, 67.2                | 7.1, 42.2                 | 1.0, 27.0               | 15.5, 36.6      |                  |                            |
|                     |                                          |                           |                           |                         |                 |                  |                            |

**Table 7-2 The T Cell Responses (IFN- $\gamma$  detection) for of 0/28 Schedule in the Phase 1 Clinical Trial**

| Time                | Indicators                               | 3 $\mu$ g group<br>(N=24) | 6 $\mu$ g group<br>(N=24) | Placebo group<br>(N=23) | Total<br>(N=71) | P (Three groups) | P (3 $\mu$ g vs 6 $\mu$ g) |
|---------------------|------------------------------------------|---------------------------|---------------------------|-------------------------|-----------------|------------------|----------------------------|
| Baseline            | <b>Mean number of spot-forming units</b> |                           |                           |                         |                 |                  |                            |
|                     | Mean (SD)                                | 0.3(0.5)                  | 0.3(0.4)                  | 0.3(0.6)                | 0.3(0.5)        | 0.4501           | 0.8130                     |
|                     | 95%CI                                    | 0.1, 0.5                  | 0.1, 0.5                  | 0.0, 0.5                | 0.2, 0.3        |                  |                            |
|                     | Median                                   | 0.2                       | 0.0                       | 0.0                     | 0.0             |                  |                            |
|                     | Min, Max                                 | 0.0,2.0                   | 0.0,1.3                   | 0.0,2.3                 | 0.0,2.3         |                  |                            |
|                     | <b>Proportion of positive responders</b> |                           |                           |                         |                 |                  |                            |
| 14 days post dose 1 | N (%)                                    | 0 (0.0)                   | 0(0.0)                    | 0(0.0)                  | 0(0.0)          | 1.0000           | 1.0000                     |
|                     | 95%CI                                    | 0.0,14.3                  | 0.0,14.3                  | 0.0,14.8                | 0.0, 5.1        |                  |                            |
|                     |                                          |                           |                           |                         |                 |                  |                            |
| 14 days post dose 1 | <b>Mean number of spot-forming units</b> |                           |                           |                         |                 |                  |                            |
|                     | Mean (SD)                                | 3.1(4.6)                  | 0.6(0.9)                  | 1.5(2.8)                | 1.7(3.3)        | 0.0045           | 0.0014                     |
|                     | 95%CI                                    | 1.1, 5.0                  | 0.1, 0.9                  | 0.2, 2.7                | -1.5, 4.9       |                  |                            |
|                     | Median                                   | 2.0                       | 0.0                       | 0.3                     | 0.3             |                  |                            |
|                     | Min, Max                                 | 0.0, 22.0                 | 0.0, 3.0                  | 0.0, 13.0               | 0.0, 22.0       |                  |                            |
|                     | <b>Proportion of positive responders</b> |                           |                           |                         |                 |                  |                            |
| 14 days post dose 1 | N (%)                                    | 1(4.2)                    | 0(0.0)                    | 1(4.4)                  | 2(2.8)          | 0.7682           | 1.0000                     |
|                     | 95%CI                                    | 0.1, 21.1                 | 0.0, 14.3                 | 0.1, 22.0               | 0.3, 9.8        |                  |                            |
|                     |                                          |                           |                           |                         |                 |                  |                            |
| 14 days post dose 2 | <b>Mean number of spot-forming units</b> |                           |                           |                         |                 |                  |                            |
|                     | Mean (SD)                                | 3.4(5.7)                  | 1.2(1.5)                  | 1.2(3.0)                | 1.9(3.9)        | 0.1723           | 0.7838                     |
|                     | 95%CI                                    | 0.9, 5.7                  | 0.5, 1.8                  | -0.1, 2.5               | -1.2,5.0        |                  |                            |
|                     | Median                                   | 0.7                       | 0.7                       | 0.0                     | 0.3             |                  |                            |
|                     | Min, Max                                 | 0.0, 18.3                 | 0.0, 6.0                  | 0.0, 14.0               | 0.0, 18.3       |                  |                            |
|                     | <b>Proportion of positive responders</b> |                           |                           |                         |                 |                  |                            |
| 14 days post dose 2 | N (%)                                    | 5 (20.8)                  | 0 (0.0)                   | 1 (4.4)                 | 6 (8.5)         | 0.0275           | 0.0496                     |
|                     | 95%CI                                    | 7.1, 42.2                 | 0.0, 14.3                 | 0.1, 22.0               | 3.2, 17.5       |                  |                            |
|                     |                                          |                           |                           |                         |                 |                  |                            |

## Appendix 8 The proportion of Spikes in CoronaVac

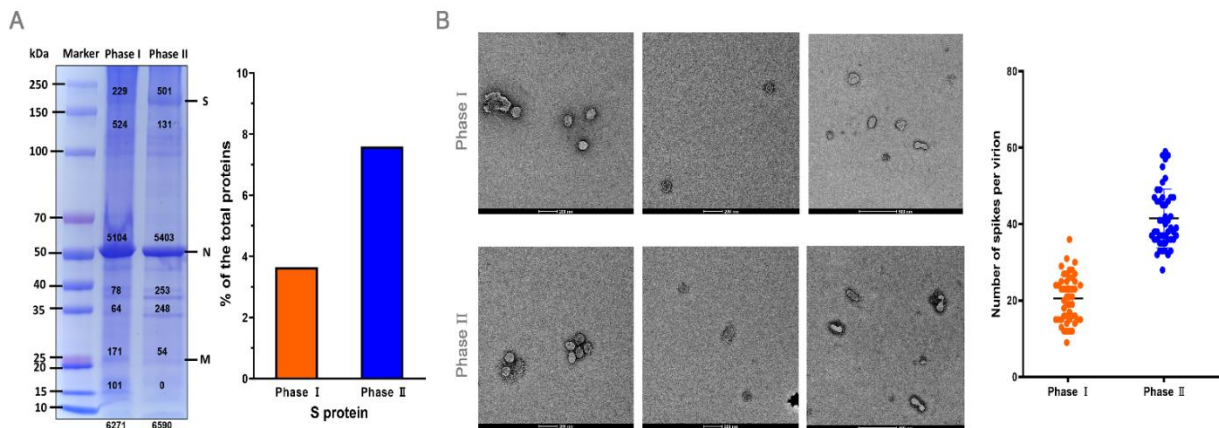

**Figure 8-1 The proportion of Spikes in CoronaVac used for phase 1 and 2 vaccine evaluation.**

(A) Protein composition analysis of CoronaVac samples from phase 1 and 2 by a NuPAGE 4-12% Bis-Tris gel, followed by whole-gel protein staining using Coomassie Blue gel staining reagent (45% methanol, 10% glacial acetic acid, 0.25% Coomassie Blue R-250). The viral protein bands of vaccine strain used for phase I and II were quantified by densitometry using ImageJ software with values depicted in the gel. The proportions of spikes to the total proteins in each gel lane in CoronaVac samples used for phase 1 and 2 were calculated separately. (B) Representative negative staining images of the CoronaVac samples used in phase 1 and 2 trials. Three images were randomly selected for each phase. Grouped scatter plot showing the numbers of Spikes on two-dimensional projections of randomly selected 50 virions of CoronaVac samples used for phase 1 (left) and phase 2 (right), respectively.

**Appendix 9 Baseline Characteristics in Phase 1 and Phase 2 Clinical Trial.**

| <b>Characteristics</b>            | <b>3µg group</b> | <b>6µg group</b> | <b>Placebo group</b> | <b>Overall</b> |
|-----------------------------------|------------------|------------------|----------------------|----------------|
| <b>Phase 1, day 0,14 schedule</b> |                  |                  |                      |                |
| N                                 | 24               | 24               | 24                   | 72             |
| Male, no·%                        | 13(54·2)         | 10(41·7)         | 15(62·5)             | 38(52·8)       |
| Han nationality, no·%             | 24(100·0)        | 24(100·0)        | 24(100·0)            | 72(100)        |
| Age (years), Mean±sd              | 44·6±9·9         | 45·0±9·2         | 39·5±10·8            | 43·0±10·2      |
| BMI (kg/m <sup>2</sup> ), Mean±sd | 25·8±4·0         | 25·5±2·4         | 24·5±2·9             | 25·3±3·2       |
| <b>Phase 1, day 0,28 schedule</b> |                  |                  |                      |                |
| N                                 | 24               | 24               | 23                   | 71             |
| Male, no·%                        | 6(25·0)          | 11(45·8)         | 8(34·8)              | 25(35·2)       |
| Han nationality, no·%             | 24(100)          | 24(100)          | 13(100)              | 71(100)        |
| Age (years), Mean±sd              | 43·1±8·1         | 44·5±11·3        | 43·5±10·9            | 43·7±10·1      |
| BMI (kg/m <sup>2</sup> ), Mean±sd | 25·6±2·8         | 24·6±3·8         | 25·9±3·8             | 25·3±3·5       |
| <b>Phase 2, day 0,14 schedule</b> |                  |                  |                      |                |
| N                                 | 120              | 120              | 60                   | 300            |
| Male, no·%                        | 54(45·0)         | 48(40·0)         | 25(41·7)             | 127(42·3)      |
| Han nationality, no·%             | 120(100)         | 120(100)         | 60(100)              | 300(100)       |
| Age (years), Mean±sd              | 42·0±10·2        | 42·4±9·0         | 43·6±7·6             | 42·5(9·3)      |
| BMI (kg/m <sup>2</sup> ), Mean±sd | 24·9±3·6         | 25·5±3·2         | 25·5±3·0             | 25·2(3·35)     |
| <b>Phase 2, day 0,28 schedule</b> |                  |                  |                      |                |
| N                                 | 120              | 120              | 60                   | 300            |
| Male, no·%                        | 63(52·5)         | 63(52·5)         | 30(50·0)             |                |
| Han nationality, no·%             | 120(100)         | 120(100)         | 60(100)              | 300(100)       |
| Age (years), Mean±sd              | 41·5±9·6         | 40·6±9·9         | 44·3±8·4             | 41·7±9·6       |
| BMI (kg/m <sup>2</sup> ), Mean±sd | 25·2±3·1         | 25·2±3·3         | 26·1±3·1             | 25·4±3·2       |



## Appendix 10 Multivariate Logistic Model Analysis

**Table 10-1 Logistic regression analysis of seroconversion rate of neutralizing antibodies to live SARS-CoV-2 at 28days after the two-doses vaccination in the phase 1 clinical trial.**

| Parameter                                      | Estimates | P value | OR              |                    |
|------------------------------------------------|-----------|---------|-----------------|--------------------|
|                                                |           |         | Point estimates | Wald 95%CI         |
| <b>Univariate analysis</b>                     |           |         |                 |                    |
| Vaccination schedule<br>(day 0,14 VS day 0,28) | -0.0159   | 0.9249  | 0.969           | (0.501, 1.875)     |
| 3µg                                            | 1.4363    | 0.0009  |                 |                    |
| 6 µg<br>(3µg VS 6µg)                           | 2.1691    | <.0001  | 0.481           | (0.162, 1.427)     |
| (3µg VS placebo)                               |           |         | 154.727         | (19.092, >999.999) |
| (6µg VS placebo)                               |           |         | 322.000         | (37.212, >999.999) |
| Age                                            | 0.00611   | 0.7150  | 1.006           | (0.974, 1.040)     |
| Sex<br>(Male VS female)                        | -0.1869   | 0.2717  | 0.688           | (0.353, 1.340)     |
| <b>Multivariable analysis</b>                  |           |         |                 |                    |
| Interpret                                      | 1.8925    | 0.2053  |                 |                    |
| Vaccination schedule<br>(day 0,14 VS day 0,28) | 0.0677    | 0.8031  | 1.145           | (0.395, 3.321)     |
| 3µg                                            | 1.4788    | 0.0008  |                 |                    |
| 6 µg<br>(3µg VS 6µg)                           | 2.3245    | <.0001  | 0.429           | (0.140, 1.316)     |
| (3µg VS placebo)                               |           |         | 196.777         | (22.353, >999.999) |
| (6µg VS placebo)                               |           |         | 458.443         | (46.735, >999.999) |
| Age                                            | -0.0490   | 0.1391  | 0.952           | (0.892, 1.016)     |
| Sex<br>(Male VS female)                        | -0.2533   | 0.3537  | 0.602           | (0.206, 1.758)     |

**Table 10-2 Logistic regression analysis of seroconversion rate of neutralizing antibodies to live SARS-CoV-2 at 28days after the two-doses vaccination in the phase 2 clinical trial.**

| Parameter                                      | Estimates | P value | OR              |                    |
|------------------------------------------------|-----------|---------|-----------------|--------------------|
|                                                |           |         | Point estimates | Wald 95%CI         |
| <b>Univariate analysis</b>                     |           |         |                 |                    |
| Vaccination schedule<br>(day 0,14 VS day 0,28) | -0.00585  | 0.9537  | 0.988           | (0.666, 1.467)     |
| 3µg                                            | 2.6812    | 0.9723  |                 |                    |
| 6 µg<br>(3µg VS 6µg)                           | 13.7377   | 0.8872  | <0.001          | (<0.001, >999.999) |
| (3µg VS placebo)                               |           |         | >999.999        | (<0.001, >999.999) |
| (6µg VS placebo)                               |           |         | >999.999        | (<0.001, >999.999) |
| Age                                            | -0.0268   | 0.0194  | 0.974           | (0.952, 0.996)     |
| Sex<br>(Male VS female)                        | -0.00517  | 0.9591  | 0.990           | (0.667, 1.470)     |
| <b>Multivariable analysis</b>                  |           |         |                 |                    |
| Interpret                                      | 1.6534    | 0.9893  |                 |                    |
| Vaccination schedule<br>(day 0,14 VS day 0,28) | -0.0373   | 0.9290  | 0.928           | (0.179, 4.799)     |
| 3µg                                            | 2.9081    | 0.9812  |                 |                    |
| 6 µg<br>(3µg VS 6µg)                           | 14.8514   | 0.9236  | <0.001          | (<0.001, >999.999) |
| (3µg VS placebo)                               |           |         | >999.999        | (<0.001, >999.999) |
| (6µg VS placebo)                               |           |         | >999.999        | (<0.001, >999.999) |
| Age                                            | -0.0147   | 0.7506  | 0.985           | (0.900, 1.079)     |
| Sex                                            | -0.8028   | 0.1508  |                 |                    |

|                  |  |  |       |                |
|------------------|--|--|-------|----------------|
| (Male VS female) |  |  | 0.201 | (0.022, 1.795) |
|------------------|--|--|-------|----------------|

**Table 10-3 Logistic regression analysis of seroconversion rate of neutralizing antibodies to live SARS-CoV-2 at 28days after the two-doses vaccination (phase 1&2 pooled).**

| Parameter                     | Estimates | P value | OR              |                      |
|-------------------------------|-----------|---------|-----------------|----------------------|
|                               |           |         | Point estimates | Wald 95%CI           |
| <b>Univariate analysis</b>    |           |         |                 |                      |
| Vaccination schedule          | -0.00880  | 0.9171  |                 |                      |
| (day 0,14 VS day 0,28)        |           |         | 0.983           | (0.705, 1.369)       |
| 3µg                           | 2.2569    | <.0001  |                 |                      |
| 6 µg                          | 3.3424    | <.0001  |                 |                      |
| (3µg VS 6µg)                  |           |         | 0.338           | (0.131, 0.870)       |
| (3µg VS placebo)              |           |         | >999.999        | (340.396, >999.999)  |
| (6µg VS placebo)              |           |         | >999.999        | (912.378, >999.999)  |
| Age                           | -0.0188   | 0.0420  | 0.981           | (0.964, 0.999)       |
| Sex                           | -0.0361   | 0.6701  |                 |                      |
| (Male VS female)              |           |         | 0.930           | (0.668, 1.297)       |
| <b>Multivariable analysis</b> |           |         |                 |                      |
| Interpret                     | 2.8314    | 0.0179  |                 |                      |
| Vaccination schedule          | 0.0222    | 0.9163  |                 |                      |
| (day 0,14 VS day 0,28)        |           |         | 1.045           | 0.457, 2.390         |
| 3µg                           | 2.3324    | <.0001  |                 |                      |
| 6 µg                          | 3.4060    | <.0001  |                 |                      |
| (3µg VS 6µg)                  |           |         | 0.342           | (0.132, 0.884)       |
| (3µg VS placebo)              |           |         | >999.999        | (404.294, >999.999)  |
| (6µg VS placebo)              |           |         | >999.999        | (>999.999, >999.999) |
| Age                           | -0.0542   | 0.0377  | 0.947           | (0.900, 0.997)       |
| Sex                           | -0.1767   | 0.4085  |                 |                      |
| (Male VS female)              |           |         | 0.702           | (0.304, 1.624)       |
